# Supplementary material for: Orchestration of dual cyclization processes and dual quenching mechanisms for enhanced selectivity and drastic fluorescence turn-on detection of cysteine
Source: Royal Society of Chemistry journal article supplement (doi:10.1039/c6cc09336a), 2017-01-01
Supplement: c6cc09336a1.pdf [file c6cc09336a1.pdf]

## Electronic Supplementary Information

# Orchestration of dual cyclization processes and dual quenching mechanisms for enhanced selectivity and drastic fluorescence turn-on detection of cysteine

Hongjuan Tong,<sup>a</sup> Jianhong Zhao,<sup>a</sup> Xiangmin Li,<sup>a</sup> Yajun Zhang,<sup>a</sup> Shengnan Ma,<sup>a</sup> Kaiyan Lou,<sup>\*a</sup> and Wei Wang<sup>\*a,b</sup>

<sup>a</sup> Shanghai Key Laboratory of New Drug Design, Shanghai Key Laboratory of Chemical Biology, School of Pharmacy, and State Key Laboratory of Bioengineering Reactor, East China University of Science and Technology, 130 Meilong Road, Shanghai 200237, China

<sup>b</sup> Department of Chemistry and Chemical Biology, University of New Mexico, Albuquerque, NM 87131-0001, USA

### Table of Contents

|                                                                            |         |
|----------------------------------------------------------------------------|---------|
| <b>General Information</b>                                                 | S2      |
| <b>Part I: Probe design</b>                                                | S3-S4   |
| <b>Part II : Synthetic Procedures and Structural Determinations</b>        | S5-S7   |
| <b>Part III: Fluorescence and UV-vis Spectroscopy Studies</b>              | S8-S15  |
| <b>Part IV: HPLC-MS and <sup>1</sup>HNMR studies of probe with Cys-OMe</b> | S16-S17 |
| <b>Part V: Biological and Imaging Studies</b>                              | S18-S19 |
| <b>Part VI: NMR and HRMS Data</b>                                          | S20-S28 |
| <b>References</b>                                                          | S29     |

## General Information

Commercial reagents were purchased from commercial suppliers and used as received, unless otherwise stated.

$^1\text{H}$  and  $^{13}\text{C}$  NMR spectra were recorded on Bruke DRX 400 (400 MHz). Data for  $^1\text{H}$  are reported as follows: chemical shift (ppm), and multiplicity (s = singlet, bs = broad singlet, d = doublet, t = triplet, q = quartet, m = multiplet). Data for  $^{13}\text{C}$  NMR are reported as ppm. Mass Spectra were obtained from East China University of Science and Technology LC-Mass spectral facility. HPLC-MS was performed using Waters e2695 using gradient elution of MeCN and  $\text{H}_2\text{O}$  with a flow rate 0.8 mL/min. UV-Vis spectra were collected on a Shimadzu UV-1800 spectrophotometer. Fluorescence spectra were collected on a FluoroMax-4 (Horiba Scientific) fluorescence spectrophotometer with slit widths were set at 2 nm both for excitation and emission. The pH measurements were carried out with a FE20 plus (Mettler Toledo) pH meter.

## Part I: Probe Design:

### a) Aldehyde

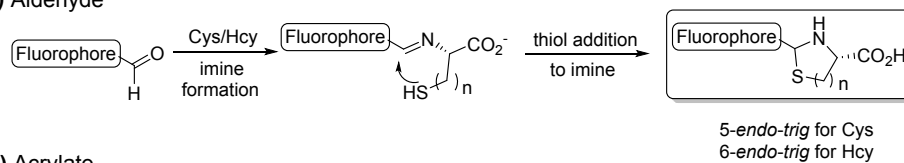

### b) Acrylate

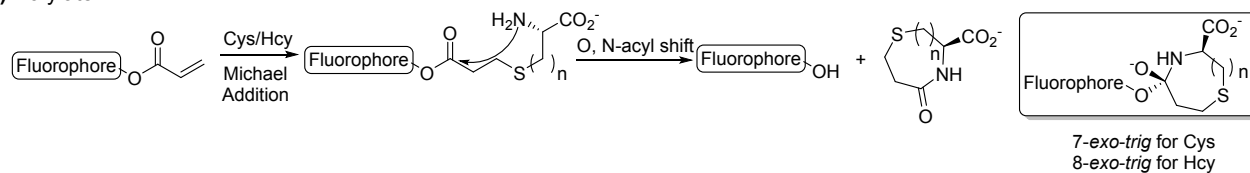

### c) Thioester

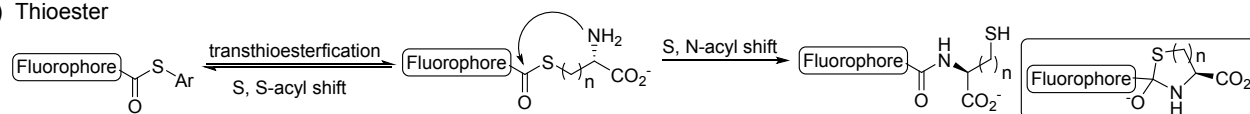

### e) Maleimide

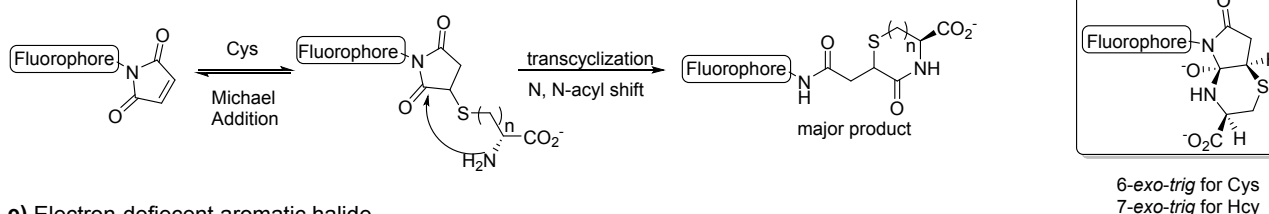

### e) Electron-deficient aromatic halide

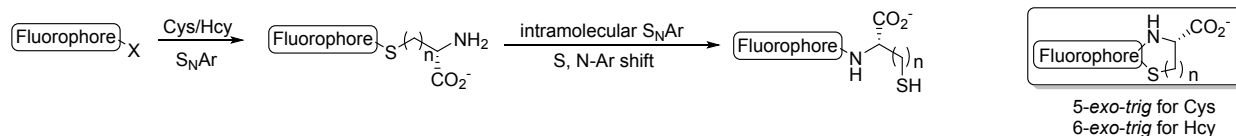

**Scheme S1. Aminothiols recognition groups with different cyclization processes.**

1) Acrylate-based Cys-selective fluorescent probes (mainly ICT sensing mechanism)

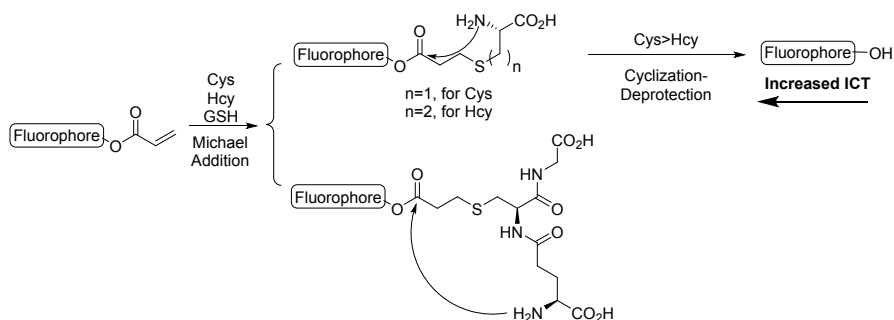

2) Maleimide-based thiol-selective fluorescent probes (mainly PET quenching mechanism)

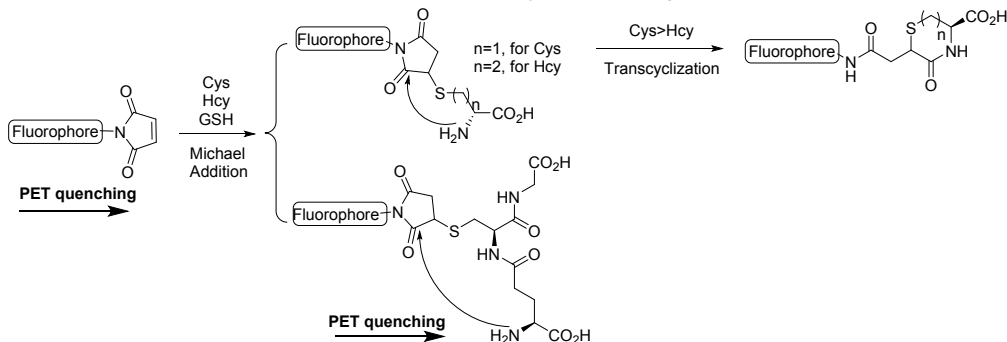

This work: dual reactive groups with dual ICT and PET quenching effect as well as two cyclization strategies for improved selectivity

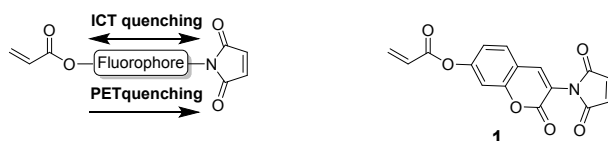

**Scheme S2. Probe design base on dual cyclization processes and dual PET and ICT quenching mechanisms of the acrylate and the maleimide groups.**

## Part II Synthetic Procedures and Structural Determinations:

### 2.1 Synthesis of the probe 1

#### 3-(2,5-dioxo-2,5-dihydro-1*H*-pyrrol-1-yl)-2-oxo-2*H*-chromen-7-yl acrylate (1)

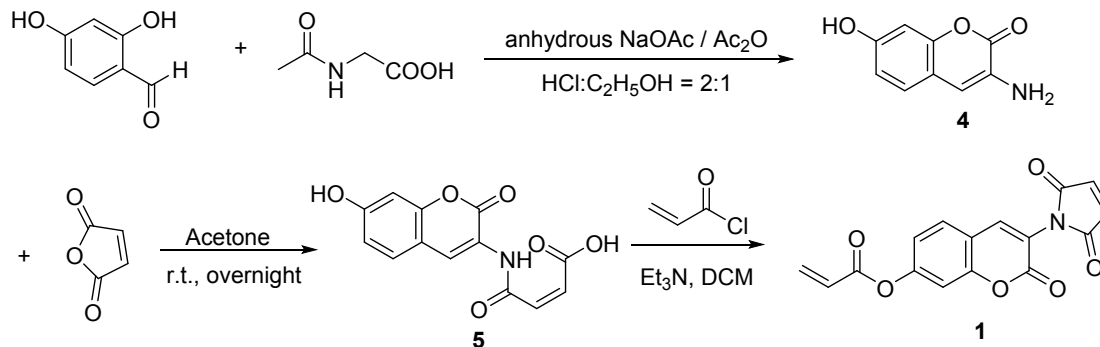

Scheme S3 Synthesis of the probe 1.

\*Compounds 4-5 were synthesized according to the literature reported synthetic procedures.<sup>1</sup>

A solution of acryloyl chloride (113  $\mu$ L, 1.4 mmol) in dichloromethane (3 mL) was added dropwise to a solution of compound 5 (193 mg, 0.7 mmol) and triethylamine (700  $\mu$ L) in dichloromethane (15 mL) in an ice-bath. After stirring for 2 h at room temperature, water (20 mL) was added to the reaction mixture. The organic phase was washed with water, then dried over Na<sub>2</sub>SO<sub>4</sub>. After the solvent was evaporated under reduced pressure, the crude solid was purified by silica gel column chromatography with petroleum ether / ethyl acetate (1:1, v/v) as the eluent followed by recrystallized from a mixture of dichloromethane and n-hexane to give pure compound 1 as white solid (201 mg, 92% yield). <sup>1</sup>H NMR (500 MHz, CDCl<sub>3</sub>):  $\delta$  7.76 (s, 1H), 7.57 (d,  $J$  = 8.4 Hz, 1H), 7.25 (s, 1H), 7.18 (d,  $J$  = 8.4 Hz, 1H), 6.91 (s, 2H), 6.66 (d,  $J$  = 17.3 Hz, 1H), 6.34 (dd,  $J$  = 17.3, 10.4 Hz, 1H), 6.10 (d,  $J$  = 10.4 Hz, 1H); <sup>13</sup>C NMR (125 MHz, CDCl<sub>3</sub>):  $\delta$  168.3 (2C), 163.7, 157.0, 154.3, 154.1, 142.2, 135.1(2C), 134.1, 129.4, 127.3, 119.2, 118.1, 116.1, 110.6. EI-HRMS:  $m/z$  [M]<sup>+</sup> calcd for C<sub>16</sub>H<sub>9</sub>NO<sub>6</sub>: 311.0430, found: 311.0429.

### 2.2 Synthesis of the reference probe 2a and product 3a

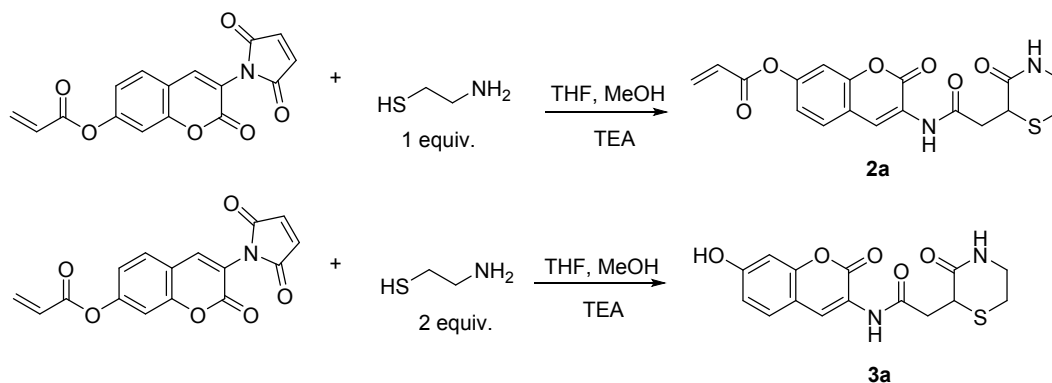

Scheme S4 Synthesis of the reference probe 2a and product 3a.

To a solution of probe **1** (31 mg, 0.1 mmol) in THF (6 mL) was added dropwise a solution of 2-aminoethane-1-thiol (8 mg, 0.1 mmol) in MeOH (1 mL) and triethylamine (20  $\mu$ L). The resulting solution was stirred at room temperature for 5 minutes. The mixture was then condensed in vacuo to remove solvents, and directly purified by silica gel flash column chromatography (petroleum ether / ethyl acetate = 1 / 2) to give **2a** as white solid (25 mg, 64% yield).  $^1\text{H}$  NMR (400 MHz, DMSO- $d_6$ )  $\delta$  9.93 (s, 1H), 8.65 (s, 1H), 8.00 (bs, 1H), 7.76 (d,  $J$  = 8.5 Hz, 1H), 7.36 (d,  $J$  = 1.5 Hz, 1H), 7.20 (dd,  $J$  = 8.5, 1.5 Hz, 1H), 6.57 (d,  $J$  = 17.3 Hz, 1H), 6.44 (dd,  $J$  = 17.3, 10.4 Hz, 1H), 6.20 (d,  $J$  = 10.4 Hz, 1H), 3.92 (t,  $J$  = 6.8 Hz, 1H), 3.54-3.38 (m, 2H), 3.07 (dd,  $J$  = 15.8, 6.8 Hz, 1H), 2.91 (dt,  $J$  = 11.5, 3.9 Hz, 1H), 2.85-2.77 (m, 1H), 2.74 (dd,  $J$  = 15.8, 6.8 Hz, 1H);  $^{13}\text{C}$  NMR (125 MHz, DMSO- $d_6$ )  $\delta$  170.4, 169.8, 163.9, 157.2, 150.7, 150.0, 134.2, 128.6, 127.4, 124.1, 123.3, 119.0, 117.6, 109.7, 41.7, 37.2, 36.2, 26.5; ESI-HRMS:  $m/z$   $[\text{M}+\text{Na}]^+$  calcd for  $\text{C}_{18}\text{H}_{16}\text{N}_2\text{O}_6\text{SNa}$ : 411.0627, found: 411.0622.

To a solution of probe **1** (31 mg, 0.1 mmol) in THF (6 mL) was added dropwise a solution of  $\beta$ -mercaptoethylamine ( $\beta$ -MEA, cysteamine) (16 mg, 0.2 mmol) in MeOH (1 mL) and triethylamine (20  $\mu$ L). The resulting solution was stirred at room temperature for 5 minutes. The mixture was then condensed in vacuo to remove solvents, and directly purified by silica gel flash column chromatography (petroleum ether / ethyl acetate = 1 / 2) to give **3a** as white solid (28 mg, 84% yield).  $^1\text{H}$  NMR (400 MHz, DMSO- $d_6$ )  $\delta$  10.38 (s, 1H), 9.73 (s, 1H), 8.53 (s, 1H), 7.98 (t,  $J$  = 4.2 Hz, 1H), 7.51 (d,  $J$  = 8.6 Hz, 1H), 6.79 (dd,  $J$  = 8.6, 2.2 Hz, 1H), 6.73 (d,  $J$  = 2.2 Hz, 1H), 3.89 (t,  $J$  = 6.8 Hz, 1H), 3.53-3.39 (m, 2H), 3.02 (dd,  $J$  = 15.7, 6.6 Hz, 1H), 2.90 (dt,  $J$  = 12.0, 4.1 Hz, 1H), 2.80 (m, 1H), 2.69 (dd,  $J$  = 15.7, 7.0 Hz, 1H);  $^{13}\text{C}$  NMR (100 MHz, DMSO- $d_6$ )  $\delta$  170.0, 169.8, 159.6, 157.8, 151.5, 129.0, 125.7, 120.9, 113.7, 111.4, 102.0, 41.7, 37.1, 36.3, 26.4; ESI-HRMS:  $m/z$   $[\text{M}+\text{Na}]^+$  calcd for  $\text{C}_{15}\text{H}_{14}\text{N}_2\text{O}_5\text{SNa}$ : 357.0521, found: 357.0519.

### 2.3 Synthesis of the reference probe 6

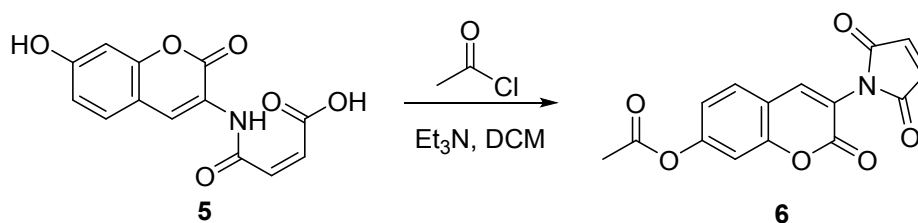

**Scheme S5** Synthesis of the reference probe **6**.

A solution of acetyl chloride (15  $\mu$ L, 0.21 mmol) in dichloromethane (1 mL) was added dropwise to a solution of compound **5** (28 mg, 0.10 mmol) and triethylamine (75  $\mu$ L, 0.54 mmol) in dichloromethane (2 mL) in an ice-bath. After stirring for 2 h at room temperature, water (5 mL) was added to the reaction mixture. The organic phase was washed with water, then dried over anhydrous  $\text{Na}_2\text{SO}_4$ . After the solvent was evaporated under reduced pressure, the crude solid was purified by silica gel column chromatography using petroleum ether / ethyl acetate (1:1, v/v) as the eluent followed by recrystallization from a mixture of dichloromethane and n-hexane to give compound **6** as white solid (23 mg, 76% yield).  $^1\text{H}$  NMR (400 MHz,  $\text{CDCl}_3$ )  $\delta$  7.74 (s, 1H), 7.55 (d,  $J$  = 8.5 Hz, 1H), 7.19 (d,  $J$  = 2.0 Hz, 1H), 7.13 (dd,  $J$  = 8.5, 2.0 Hz, 1H), 6.90 (s, 2H), 2.35 (s, 3H).  $^{13}\text{C}$  NMR (100 MHz,  $\text{CDCl}_3$ )  $\delta$  168.6, 168.3(2C), 157.0, 154.2, 154.1, 142.2, 135.1(2C), 129.4, 119.2, 118.0, 116.1, 110.6, 21.3. ESI-HRMS:  $m/z$   $[\text{M}+\text{Na}]^+$  calcd for  $\text{C}_{15}\text{H}_9\text{NO}_6\text{Na}$ : 322.0328, found: 322.0321.

## 2.4 Synthesis of the reference probe 7

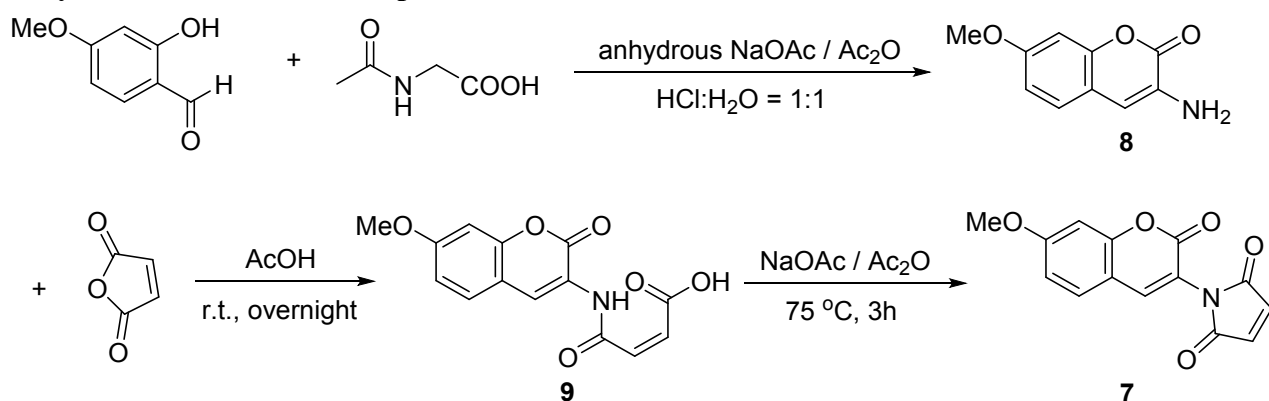

**Scheme S6** Synthesis of the reference probe 7.

A solution of 3-amino-7-methoxy-2H-chromen-2-one (**8**) (prepared according to the literature<sup>2</sup>) (76 mg, 0.40 mmol) and maleic anhydride (49 mg, 0.50 mmol) in glacial acetic acid (5 mL) was stirred at room temperature overnight. After filtration, the yellow solid was washed by ethyl acetate to give compound **9** which was used without further purification for the next step.

The acid **9** was suspended in acetic anhydride (6 mL), and anhydrous sodium acetate (41 mg, 0.50 mmol) was added. The resulting mixture was stirred at 75 °C for 3 hours and then cooled to room temperature. The solvent was then removed in vacuo, and the residue was directly purified by silica gel flash column chromatography (petroleum ether / dichloromethane = 1 / 2) to give compound **7** as pale yellow solid (65 mg, 60% yield). <sup>1</sup>H NMR (400 MHz, CDCl<sub>3</sub>) δ 7.69 (s, 1H), 7.42 (d, *J* = 8.6 Hz, 1H), 6.90 (dd, *J* = 8.6, 2.3 Hz, 1H), 6.89 (s, 2H), 6.86 (d, *J* = 2.3 Hz, 1H), 3.89 (s, 3H). <sup>13</sup>C NMR (100 MHz, CDCl<sub>3</sub>) δ 168.7 (2C), 163.9, 157.8, 155.7, 143.1, 135.0 (2C), 129.6, 115.1, 113.6, 111.9, 100.9, 56.1. ESI-HRMS: *m/z* [M+H]<sup>+</sup> calcd for C<sub>14</sub>H<sub>10</sub>NO<sub>5</sub>: 272.0559, found 272.0558.

## Part III: Fluorescence and UV-vis Spectroscopy Studies

### 3.1 Spectroscopic materials

All aqueous solutions were prepared using double distilled water. Enantiomerically pure natural amino acids were used in all experiments, except for Hcy. All solutions of the biological analytes were freshly prepared (100  $\mu\text{M}$  in distilled water, unless otherwise stated) and used within 12 hours. Probe **1** stock solution (1 mM in dry DMSO) was prepared and stored at  $-20\text{ }^\circ\text{C}$ . All fluorescence and absorption spectroscopic measurements were performed in 10 mM phosphate buffer pH = 7.4 at  $25\text{ }^\circ\text{C}$  unless otherwise stated. Samples for absorption and fluorescence measurements were contained in 1 cm $\times$ 1 cm quartz cuvettes (3.5 mL volume).

### 3.2 Fluorescence titration experiment for determination of the suitable concentration of probe **1** and Cys for further fluorescence studies.

Since the fluorimeter has a linear detection range between 0~ 2000000 cps, we mandatory chose 1  $\mu\text{M}$  probe **1** for in vitro fluorescence studies. Fluorescence titration experiment of 1  $\mu\text{M}$  of probe **1** with increasing amount of Cys determined that a minimum 40  $\mu\text{M}$  of Cys was required for generating a maximum fluorescence response in 30 mins (**Figure S1**).

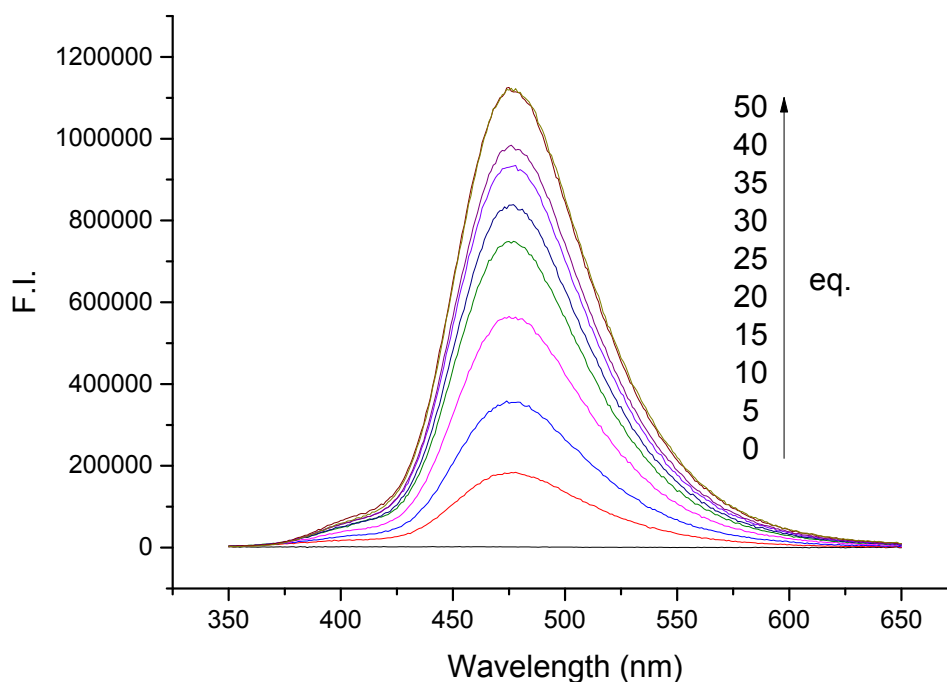

**Figure S1** Fluorescence spectra ( $\lambda_{\text{ex}}=340\text{ nm}$ ) of probe **1** (1  $\mu\text{M}$ ) towards increasing concentration of Cys (0, 5, 10, 15, 20, 25, 30, 35, 40, 50  $\mu\text{M}$ ). (All measurement was taken in 10 mM PBS buffer (pH 7.4) at  $25\text{ }^\circ\text{C}$  with  $\lambda_{\text{ex}}=340\text{ nm}$  and incubation time = 30 min).



### 3.3 Time-dependent fluorescence emission studies

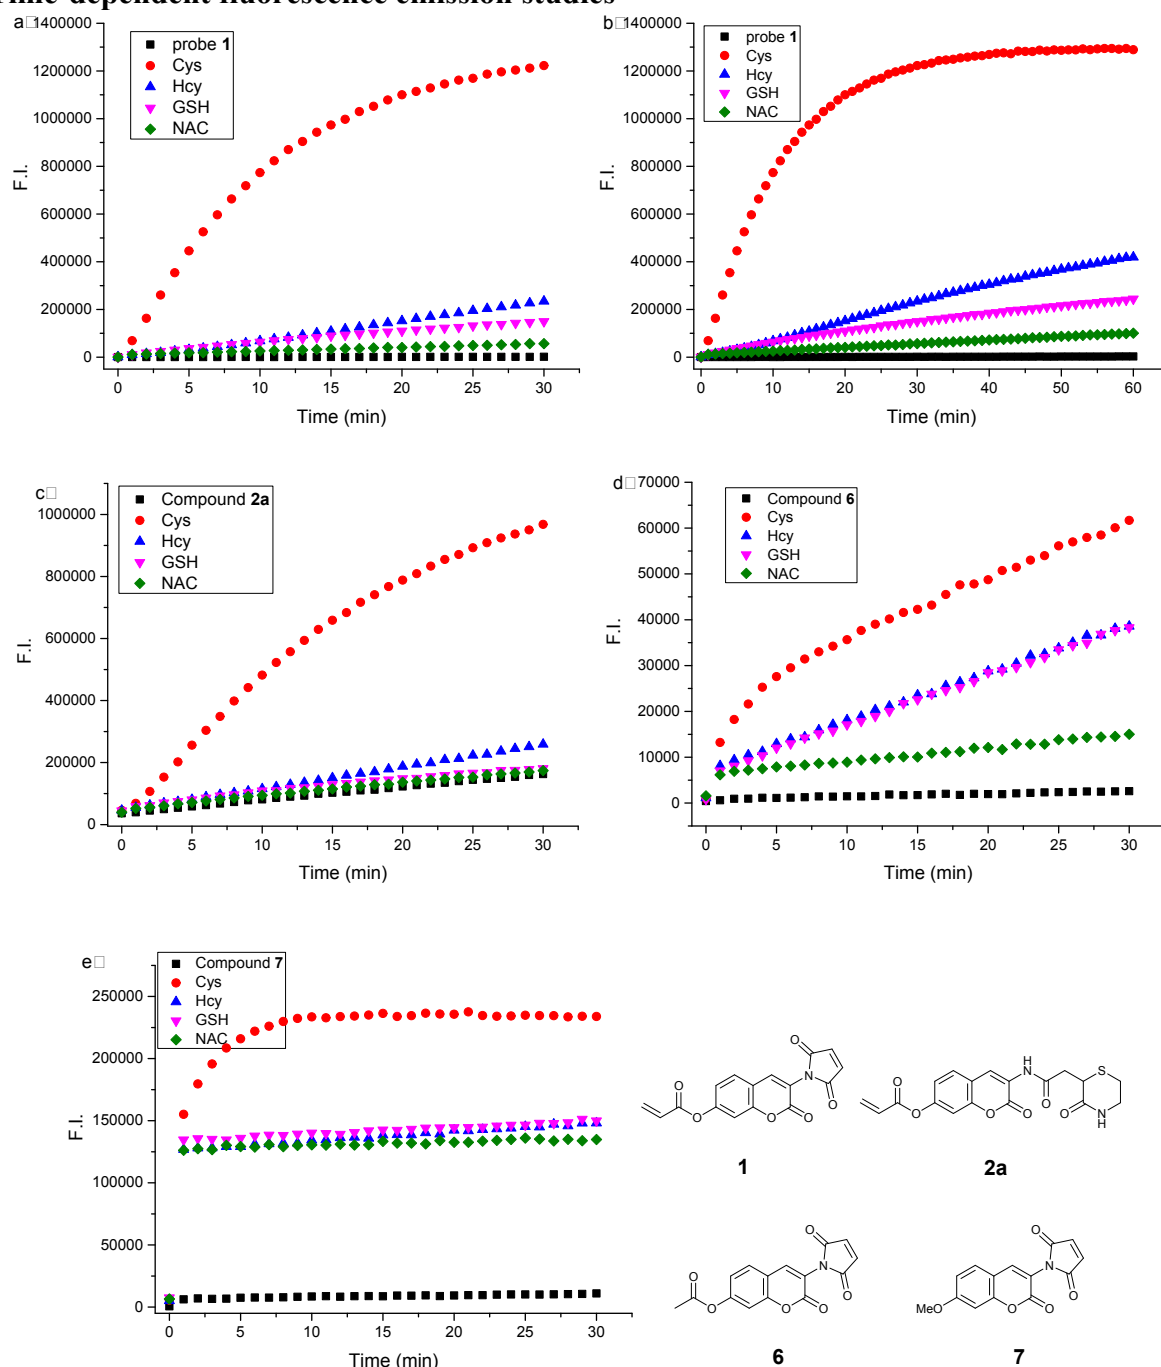

**Figure S2** a) Time-dependent (0 to 30 min) fluorescence intensity of probe 1 (1  $\mu$ M) and probe 1 (1  $\mu$ M) upon addition of 40 equiv. of Cys, Hcy, GSH, NAC at 476 nm. b) Time-dependent (0 to 60 min) fluorescence intensity of probe 1 (1  $\mu$ M) and probe 1 (1  $\mu$ M) upon addition of 40 equiv. of Cys, Hcy, GSH, NAC at 476 nm. c) Time-dependent fluorescence intensity of compound 2a (1  $\mu$ M) and compound 2a (1  $\mu$ M) upon addition of 40 equiv. of Cys, Hcy, GSH, NAC at 476 nm. d) Time-dependent fluorescence intensity of compound 6 (1  $\mu$ M) and compound 6 (1  $\mu$ M) upon addition of 40 equiv. of Cys, Hcy, GSH, NAC at 476 nm. e) Time-dependent fluorescence intensity of compound 7 (1  $\mu$ M) and compound 7 (1  $\mu$ M) upon addition of 40 equiv. of Cys, Hcy, GSH, NAC at 476 nm. (All measurement was taken in 10 mM PBS buffer, pH=7.4 at 25  $^{\circ}$ C with  $\lambda_{ex}$ =340 nm).

### 3.4 Normalized fluorescence excitation and emission spectra of probe 1 upon incubation of Cys.

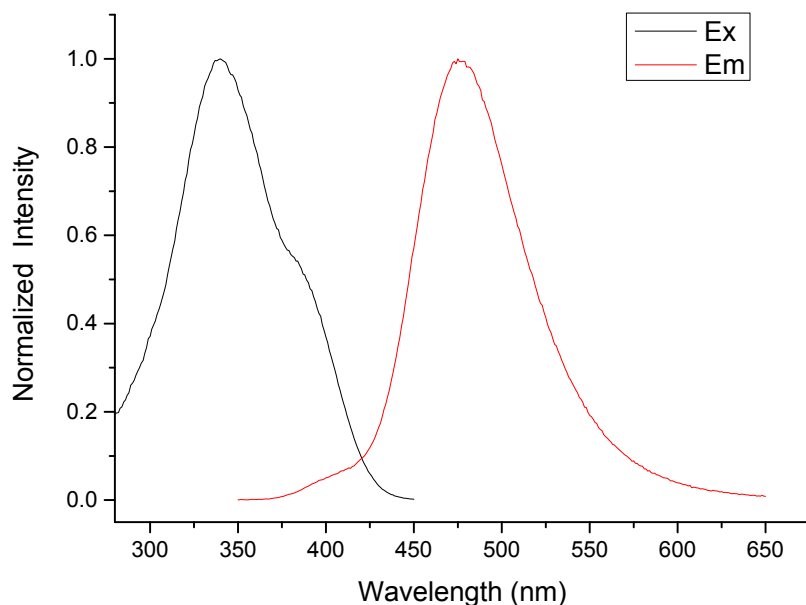

**Figure S3** Normalized fluorescence excitation ( $\lambda_{em} = 476$  nm) and emission ( $\lambda_{ex} = 340$  nm) spectra of probe **1** ( $1 \mu\text{M}$ ) in the presence of Cys ( $40 \mu\text{M}$ ) in PBS buffer ( $10$  mM, pH  $7.4$ ).

### 3.5 Comparison of normalized fluorescence emission spectrum of probe 1 after incubation with Cys with normalized fluorescence emission compound 3a.

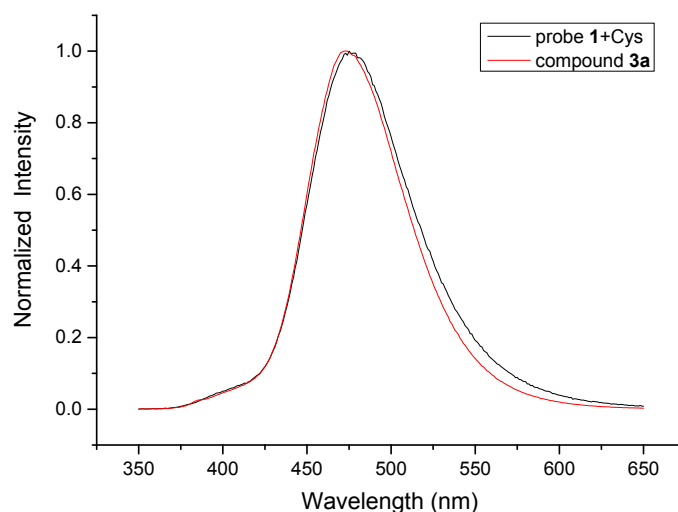

**Figure S4** Normalized fluorescence emission ( $\lambda_{ex}=340$  nm) spectra of probe **1** ( $1 \mu\text{M}$ ) upon treatment of Cys ( $40 \mu\text{M}$ ) and the compound **3a** ( $1 \mu\text{M}$ ). (All measurements were done in  $10$  mM PBS buffer (pH  $7.4$ ) at  $25$  °C with incubation time =  $30$  min).

### 3.6 Determination of detection limit of probe 1 towards Cys

The detection limit of probe 1 (1  $\mu\text{M}$ ) towards Cys was derived from the fluorescence titration experiment (476 nm, excited at 340 nm) with increasing amount of Cys (0-5.0  $\mu\text{M}$ ) as show in **Figure S5**. An excellent linear relationship ( $R^2 = 0.9944$ ) was obtained at Cys concentrations between 0 and 5  $\mu\text{M}$ . And then the fluorescence intensity data of free probe 1 (1  $\mu\text{M}$ ) at 476 nm were collected ten times as the blank measurements for calculation of the standard deviation. The detection limit was calculated using the following the equation: detection limit =  $3\sigma_{bi}/m$ , where  $\sigma_{bi}$  is the standard deviation of the blank measurements ( $\sigma_{bi} = 183.11$ );  $m$  is the slope obtained from linear regression of fluorescence intensity at 476 nm versus Cys concentration. The detection limit was calculated to be 13.7 nM at S/N = 3.

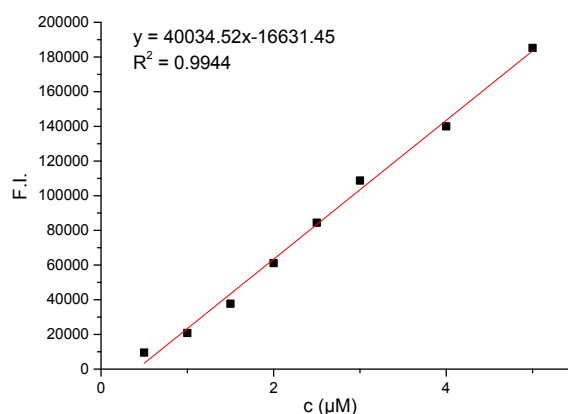

**Figure S5** A linear relationship between fluorescence intensity at 476 nm and Cys concentration for probe 1 (incubation time = 30 min at 25  $^{\circ}\text{C}$ ).

### 3.7 Time-dependent UV-Vis spectra of probe 1 with *N*-acetyl cysteine (NAC)

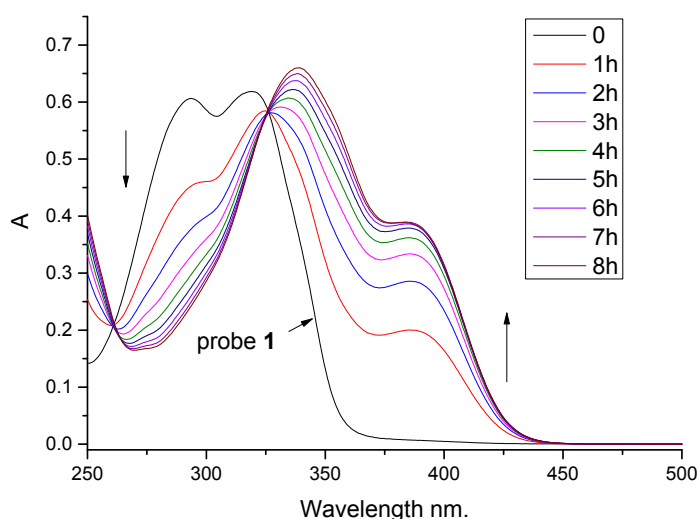

**Figure S6**. Time-dependent absorption spectra of probe 1 (50  $\mu\text{M}$ ) upon addition of NAC (2 mM) (All measurements were taken in 10 mM PBS buffer solution at pH = 7.4 with incubation time of 30 min).

### 3.8 Time-dependent UV-vis spectra of reference probe 2a with NAC

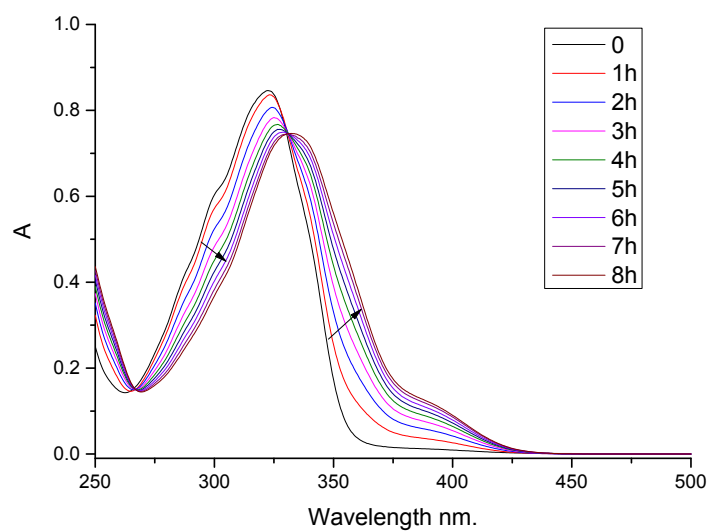

**Figure S7.** Time-dependent absorption spectra of the reference probe **2a** (50 μM) upon addition of NAC (2 mM) (All measurements were taken in 10 mM PBS buffer solution at pH = 7.4 with incubation time of 30 min).

### 3.9 Comparison of UV-vis spectra of probe **1** with 40 equiv. of Cys at 4 min with NAC at extended time as well as the reference probe **2a** with NAC at extended time

The purpose of comparison of UV-vis spectra was to determine the intermediate formed at the time point of 4 min when probe **1** reacted with 40 equiv. of Cys. Due to the reported pKa value of the thiol group of Cys and NAC were 8.22 and 9.5, respectively,<sup>3, 4</sup> the reaction of thiol-Michael addition of Cys should be faster than NAC at pH=7.4. Therefore, NAC needs significant more reaction time for thiol-Michael addition to complete.

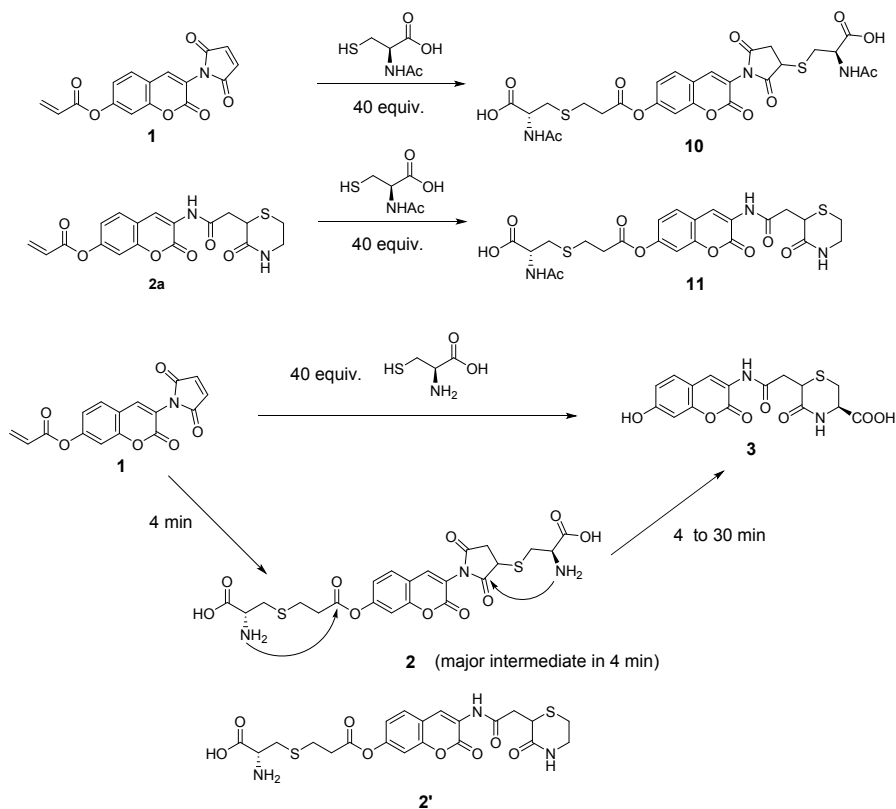

**Scheme S7** The reaction of probe **1** and probe **2a** with NAC and potential intermediates of probe **1** with Cys at time point of 4 min.

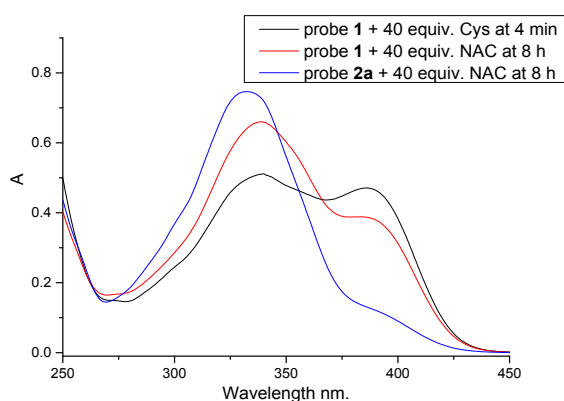

**Figure S8.** Comparison of UV-Vis spectra of probe **1** with 40 equiv. of Cys at 4 min (black line) with NAC at extended time (red line) as well as the reference probe **2a** with NAC at extended time (blue line). From the fact that the black line more resembled to the red line, we expected the intermediate was structurally close to the product **10** in **Scheme S7**.

### 3.10 Determination of fluorescence quantum yields of **1**, **2a**, and **3a**

The quantum yield of **1**, **2a** and **3a** were determined according to the literature.<sup>5</sup> Quinine sulfate with 0.1 M H<sub>2</sub>SO<sub>4</sub> was chosen as standard ( $\phi = 0.557$ ,  $\lambda_{\text{ex}} = 350$  nm). The quantum yields of **1**, **2a**, and **3a** were measured in distilled water with 5% DMSO,  $\lambda_{\text{ex}} = 350$  nm. Fluorescence quantum yields were obtained with the following equation. Where  $\phi$  is quantum yield;  $I$  is integrated area under the corrected emission spectra;  $A$  is absorbance at the excitation wavelength;  $\eta$  is the refractive index of the solution; the subscripts  $s$  and  $b$  refer to the sample and the standard, respectively.

$$\phi_s = \phi_b I_s A_b \eta_s / I_b A_s \eta_b$$

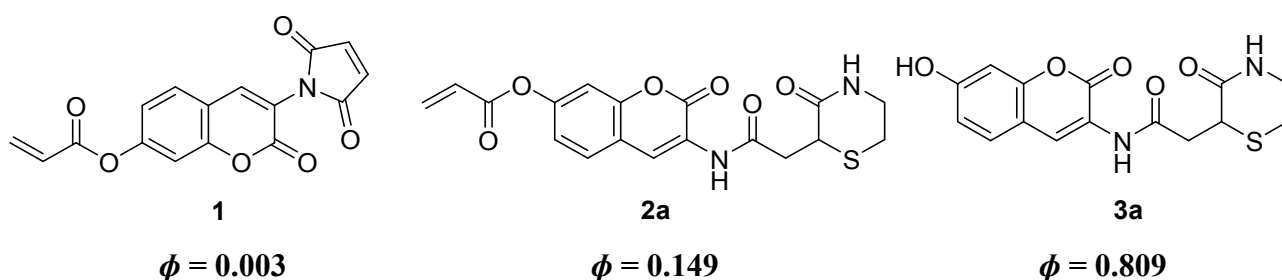

**Figure S9** Fluorescence quantum yields of **1**, **2a**, and **3a**.

### 3.11 Selectivity studies.

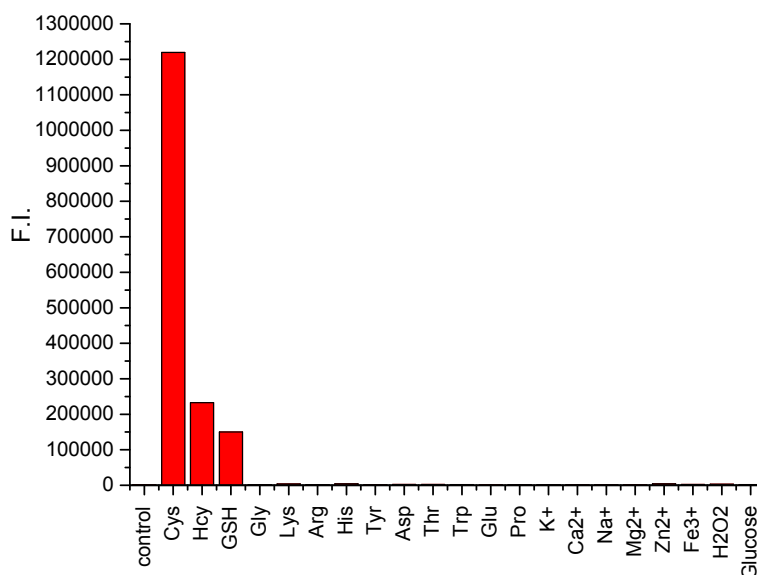

**Figure S10** Fluorescence response of probe **1** (1  $\mu\text{M}$ ) at 476 nm ( $\lambda_{\text{ex}} = 340$  nm) toward various species in PBS buffer (10 mM, pH 7.4) including 40 equiv. aminothiols (Cys, Hcy, GSH), 400 equiv. different amino acids (Gly, Lys, Arg, His, Tyr, Asp, Thr, Trp, Glu, Pro), 400 equiv. metal ions (K<sup>+</sup>, Ca<sup>2+</sup>, Na<sup>+</sup>, Mg<sup>2+</sup>, Zn<sup>2+</sup>, Fe<sup>3+</sup>), 400 equiv. H<sub>2</sub>O<sub>2</sub>, and 400 equiv. glucose. The control group was the probe **1** (1  $\mu\text{M}$ ) alone.

### 3.12 pH-dependence studies.

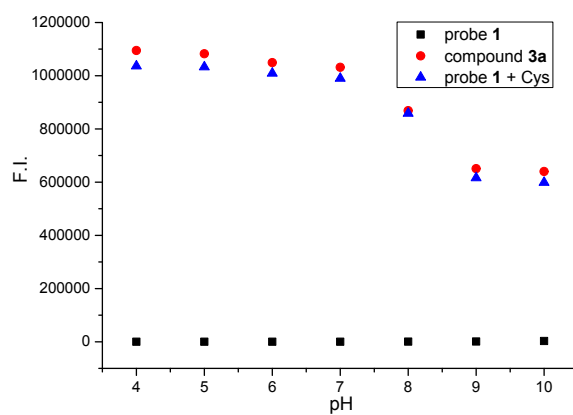

**Figure S11** pH-dependent fluorescence intensity at 476 nm ( $\lambda_{\text{ex}} = 340$  nm) for probe **1** (1  $\mu\text{M}$ ), reference product **3a**, and probe **1** after incubation with 40 equiv. of Cys at pH 7.4 for 30 min at various pHs from 4-10.

## Part IV: HPLC-MS and <sup>1</sup>HNMR Studies of probe 1 with Cys-OMe

### 4.1 HPLC-MS studies of probe 1 incubated with cysteine methyl ester

The solution of probe 1 (50 μM) was incubated with or without L-Cys-OMe.HCl (2 mM) in a mixture of MeCN and PBS buffer (10 mM, pH 7.4, 2:8 v/v) for 30 min. After reaction, the solution was filtered through a syringe filter before analyzed by HPLC-MS.

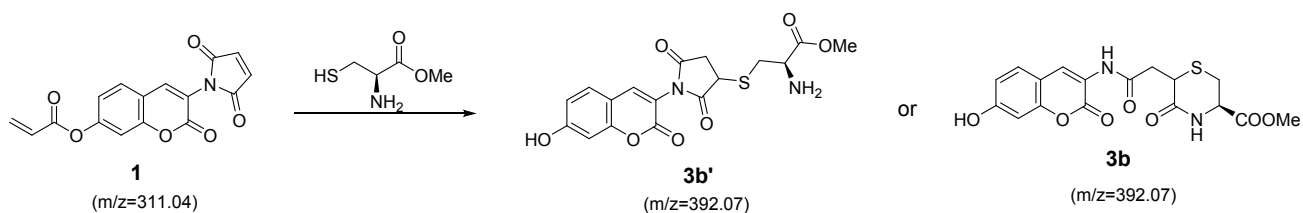

**Scheme S8** Model reaction of probe 1 with cysteine methyl ester.

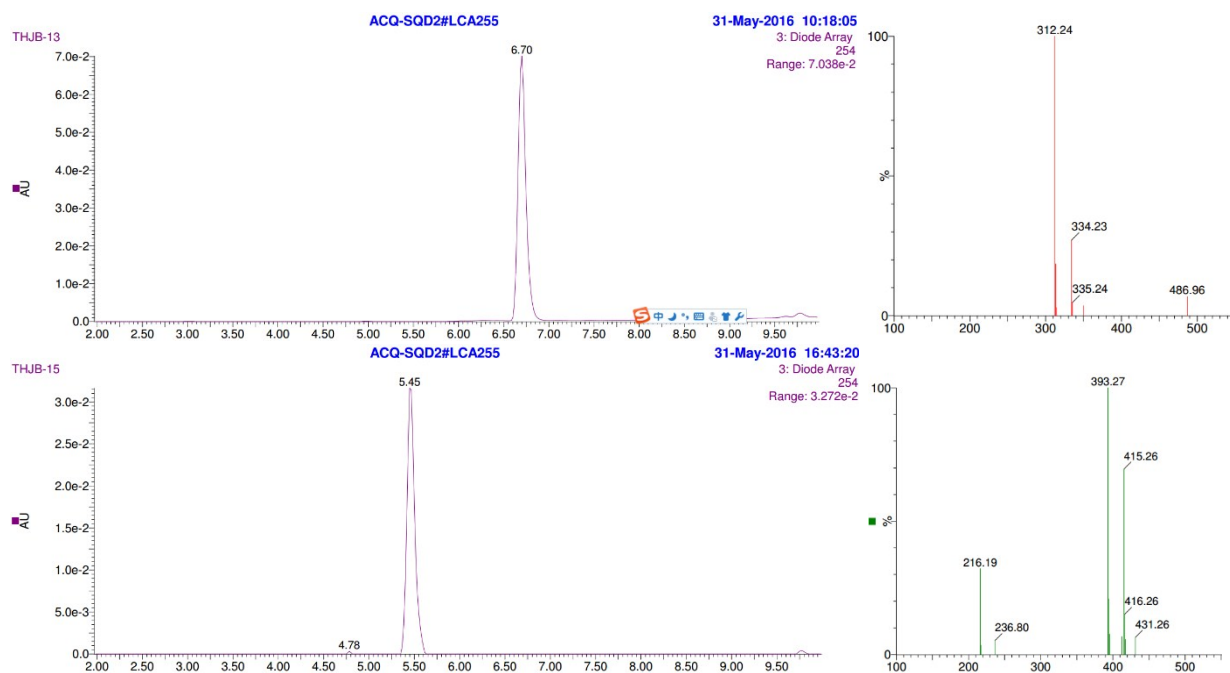

**Figure S12** LC-MS profiles of a) probe 1, b) probe 1 with L-Cys-OMe, incubation time = 30 min. (LC peaks were monitored by UV absorption at 254 nm and MS was detected in ESI positive mode.)



## 4.2 <sup>1</sup>HNMR studies of probe 1 incubated with cysteine methyl ester

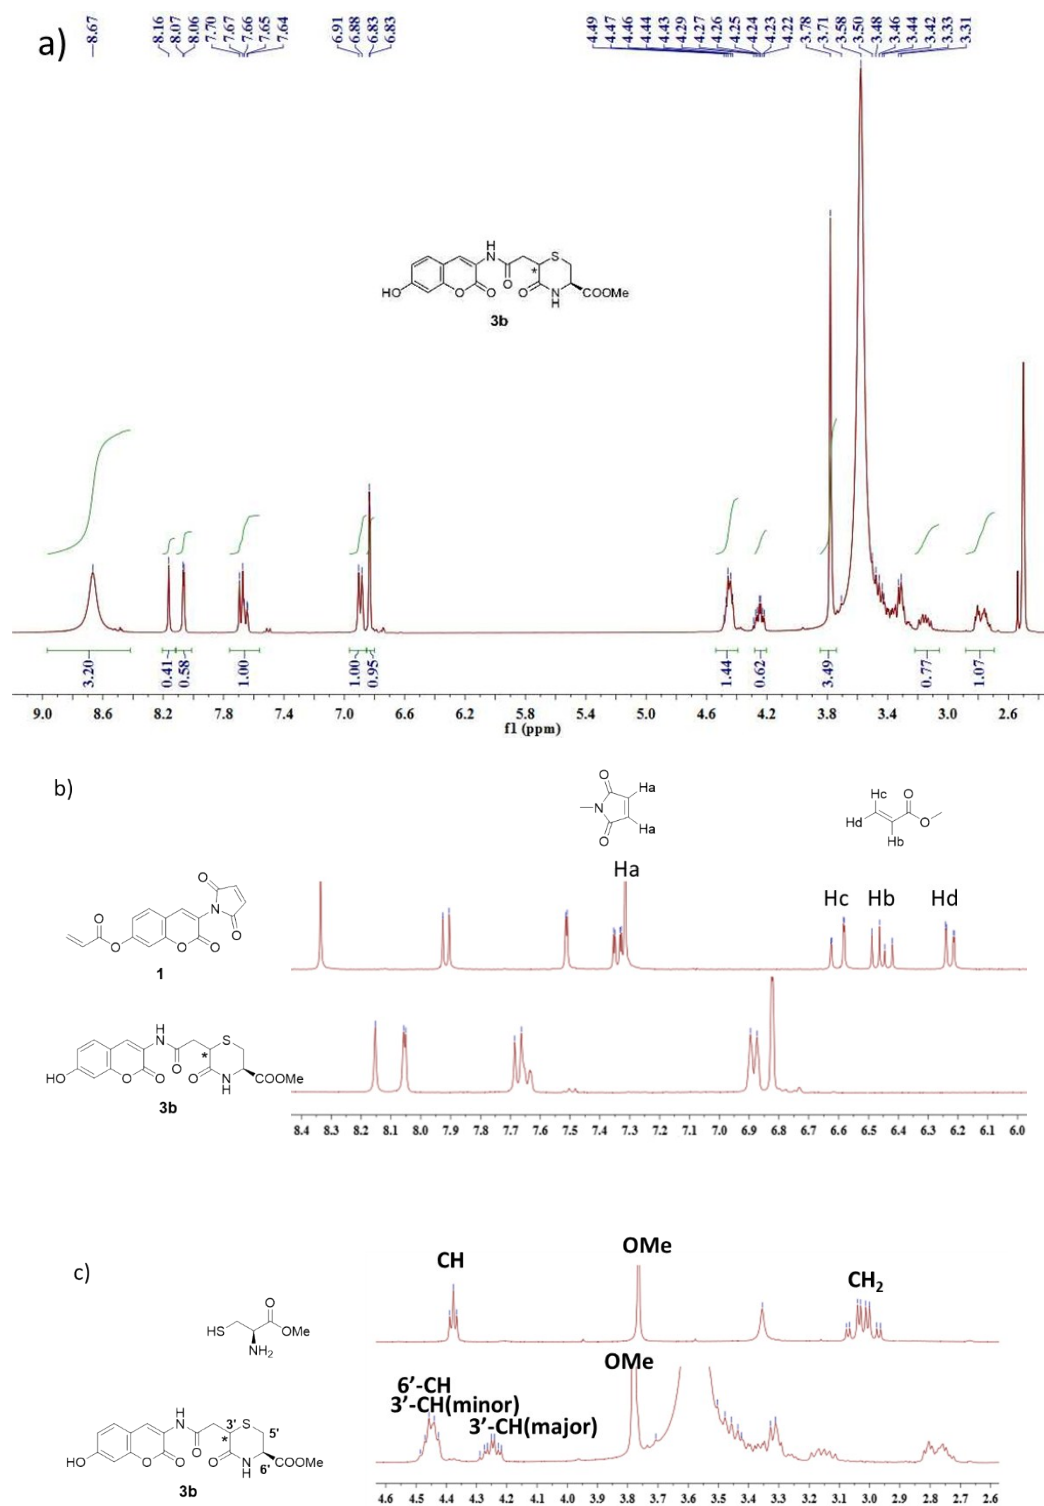

**Figure S13** a) <sup>1</sup>HNMR spectrum of **3b** containing a mixture of two diastereomers in a ratio about 3:2 (integration ratio from the peak at  $\delta$  8.07 to the peak at 8.16); b) comparison of aromatic region ( $\delta$  8.4-6.0) of <sup>1</sup>HNMR spectrum of **3b** with that of the probe **1**; c) comparison of aliphatic region ( $\delta$  4.6-2.6) of <sup>1</sup>HNMR spectrum of **3b** with that of the Cys-OMe.

## Part V: Biological Applications

**Cell culture:** HeLa cells were cultured in Dulbecco's Modified Eagle Medium (DMEM) supplemented with 10% fetal bovine serum (FBS) and 1% Glutamine, maintained at 37 °C in a humidified atmosphere containing 95% air and 5% CO<sub>2</sub>.

### 5.1 Cytotoxicity assay of the probe 1

Cell survival was evaluated by the MTS assay (CellTiter 96 Aqueous One Solution Reagent), based on the conversion of a tetrazolium compound, 3-(4,5-dimethylthiazol-2-yl)-5-(3-carboxymethoxyphenyl)-2-(4-sulfophenyl)-2H tetrazolium (MTS), to a colored formazan product by living cells.<sup>6</sup> Absorbance was read by a microplate reader (Molecular Devices SpectraMax I3) at 490 nm. The quantity of formazan product, as measured by the amount of absorbance, was directly proportional to the metabolic activity of viable cells in the culture.

Cell viability (% of control) =  $(OD_{EG} - OD_{ZG}) / (OD_{CG} - OD_{ZG}) * 100\%$

IC<sub>50</sub> value was calculated using GraphPad Prism software based on the cell viability data at different concentrations.

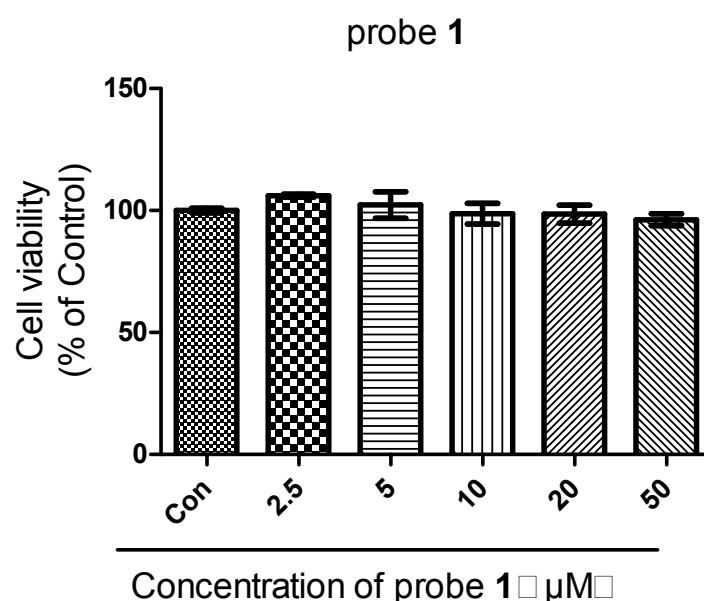

**Figure S14.** Cell viabilities of probe 1 at various concentrations for HeLa Cells after 24 h incubation.

### 5.2 Fluorescence microscopy experiments

HeLa cells were seeded in a 6-well glass tissue culture dish at the cell culture facility of East China University of Science and Technology (ECUST) and cultured in DMEM medium (with phenol red, Gibco/Invitrogen) with 10% Fetal Bovine Serum and 1% Glutamine at 37 °C for 24 hours. Before incubation with probe 1 and other reagents, the upper medium in the culture dish was removed, and the cultured cells were washed with PBS buffer three times. The first group cells were first incubated in a solution of *N*-ethylmaleimide (1 mM in distilled water) for 1h to reduce the concentration of all thiols including cysteine, then washed with PBS buffer three times before incubated with probe 1 in

DMEM medium (20  $\mu$ M, containing 2% DMSO, prepared from 10 mM stock solution in DMSO) at 37  $^{\circ}$ C for 1 h. The second to fourth group cells were first pretreated with 1 mM *N*-ethylmaleimide for 1h, then washed with PBS buffer three times and pretreated with 500  $\mu$ M Cys, Hcy and GSH for 30 min respectively, finally washed with PBS buffer three times again and incubated with probe **1** solution following the same procedure described above for 1 h. Fluorescence images was obtained using an Olympus IX51 equipped with a Xenon lamp and Olympus digital camera.

In another studies, HepG2 cells were used instead of HeLa cells, and the concentration of *N*-ethylmaleimide 500  $\mu$ M was used for cell pretreatment, while all the other conditions were kept the same.

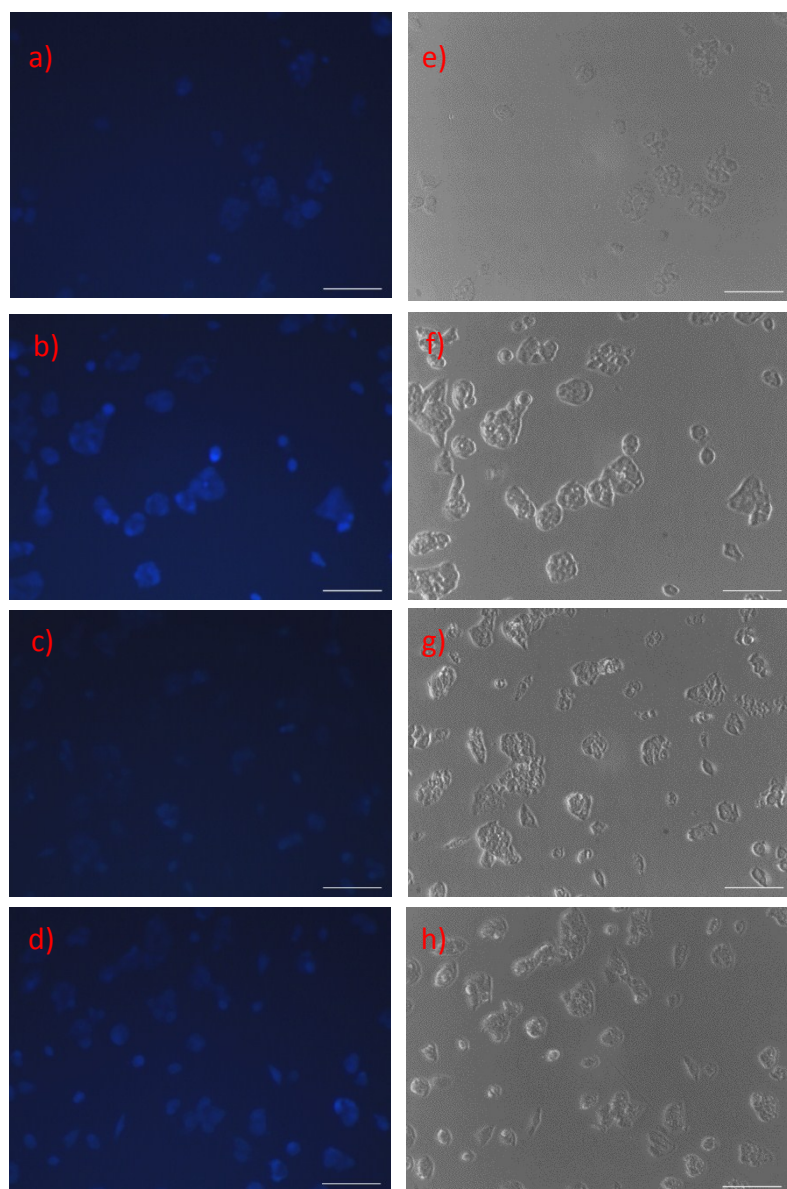

**Figure S15.** Fluorescence images (e-h) collected at 430-495 nm (blue to cyan-blue,  $\lambda_{\text{ex}} = 400$  nm) and the corresponding bright field view (a-d) of HepG2 cells after different treatment. a) and e) were pretreated with 500  $\mu$ M *N*-ethylmaleimide before incubation with the probe **1** for 1 h. (b, f), (c, g), and (d, h) were first pretreated with 500  $\mu$ M *N*-ethylmaleimide for 1 h, then pretreated with 500  $\mu$ M Cys, Hcy, and GSH for 30 min respectively, finally incubated with 20  $\mu$ M probe **1** for 1 h (scale bar = 100

μM).

## Part VI: NMR and HRMS Data

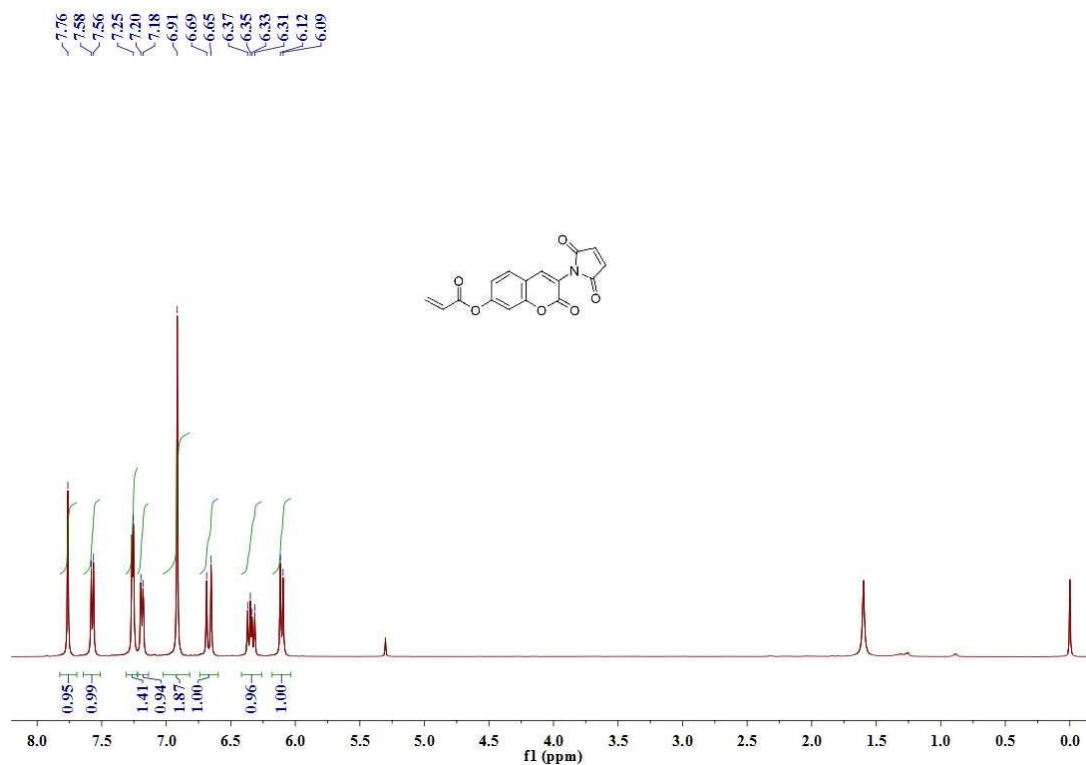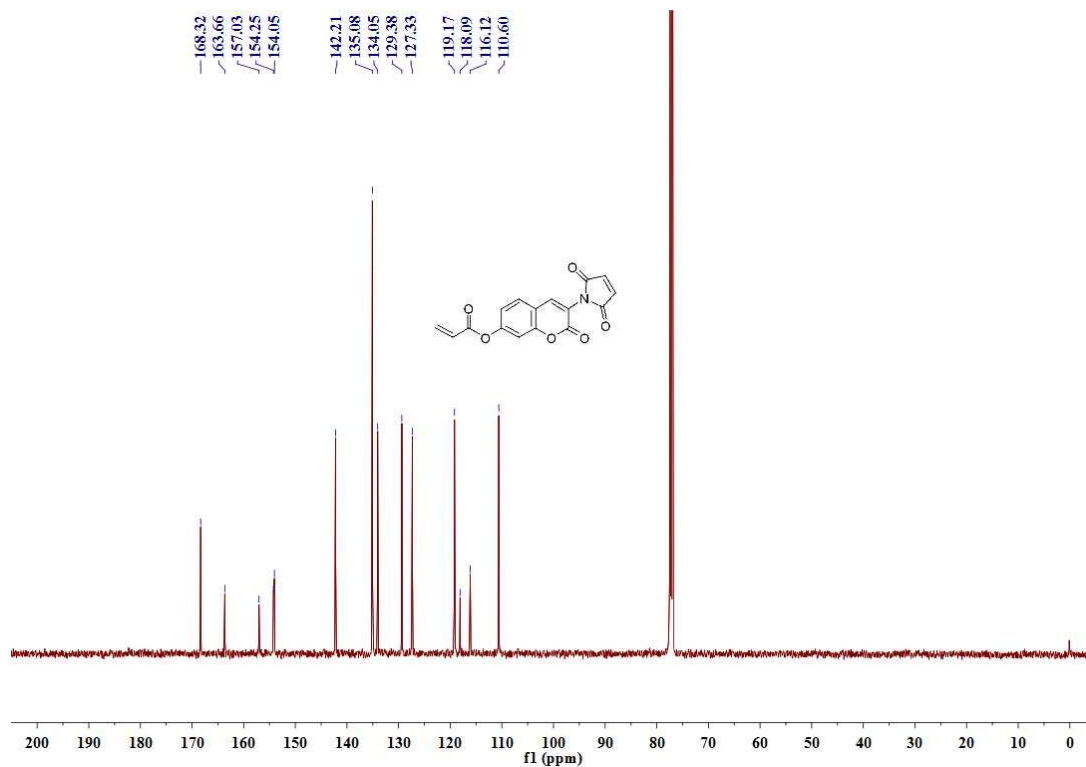

Elemental Composition Report

Multiple Mass Analysis: 13 mass(es) processed

Tolerance = 5.0 mDa / DBE: min = -1.5, max = 50.0

Element prediction: Off

Monoisotopic Mass, Odd and Even Electron Ions

153 formula(e) evaluated with 16 results within limits (all results (up to 1000) for each mass)

Elements Used:

C: 0-16 H: 0-9 N: 0-1 O: 0-8

WW-TJ-J

20160198 429 (7.154) Cm (429-(46+171))

Waters GCT Premier

TOF MS EI+  
2.10e+004

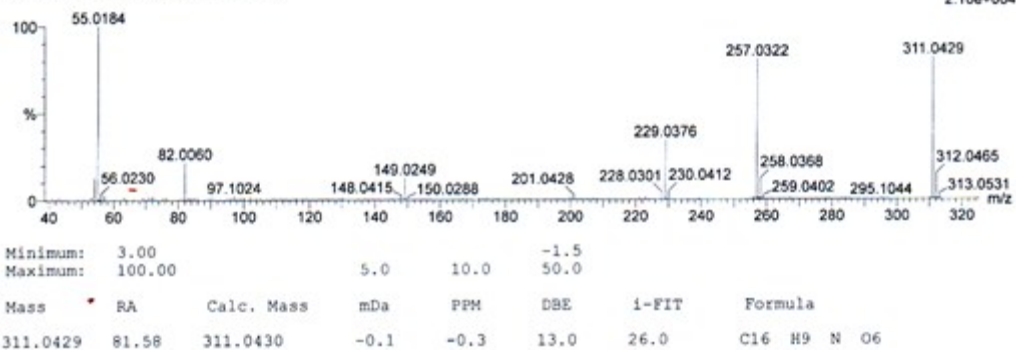

Figure S16. <sup>1</sup>H NMR, <sup>13</sup>C NMR, and HRMS of probe 1.

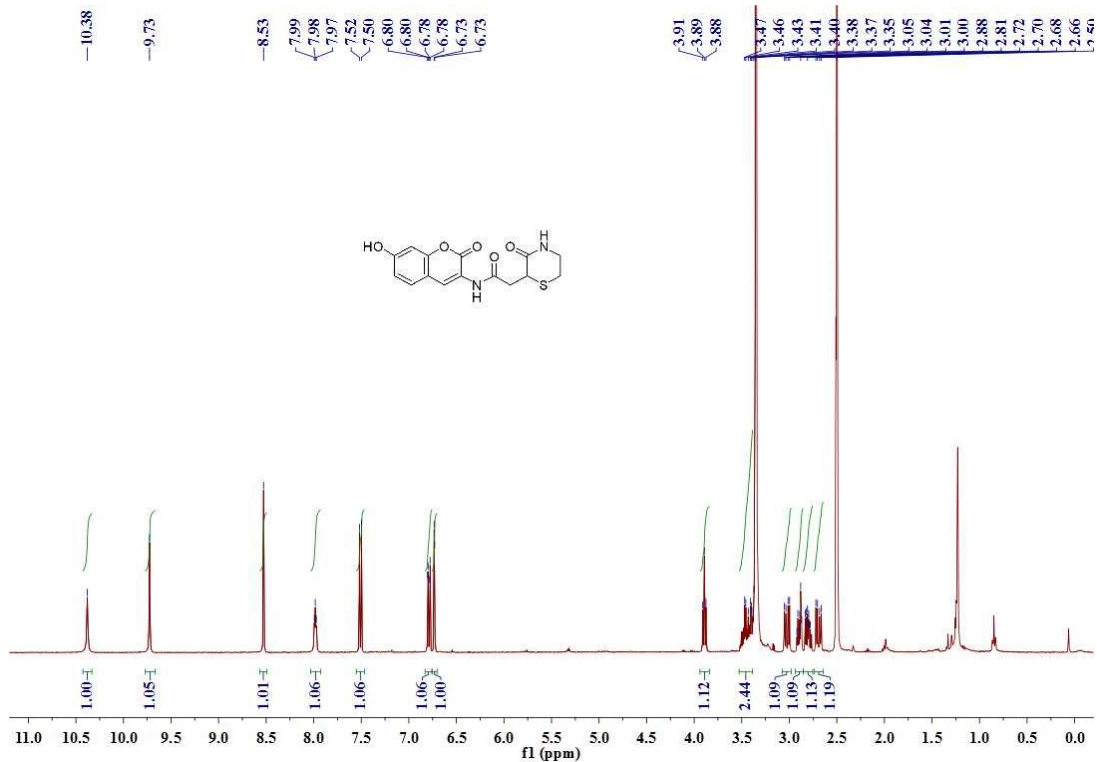

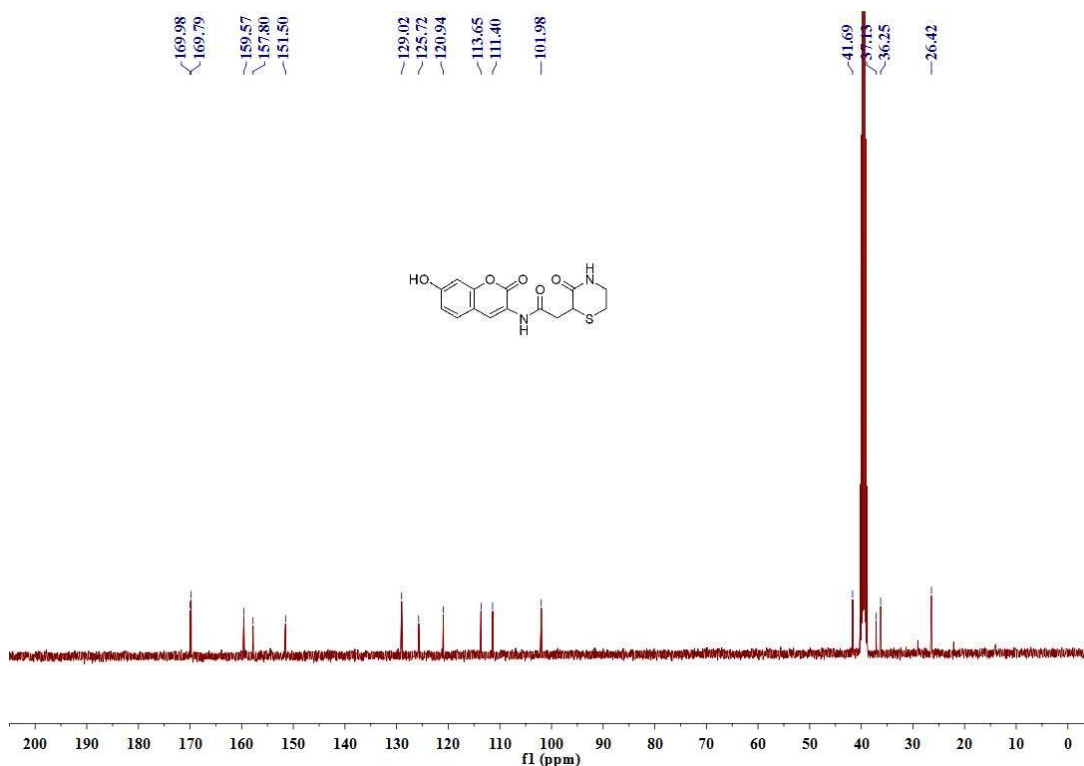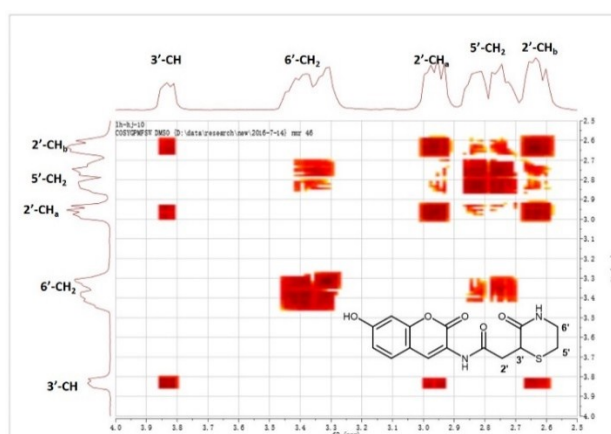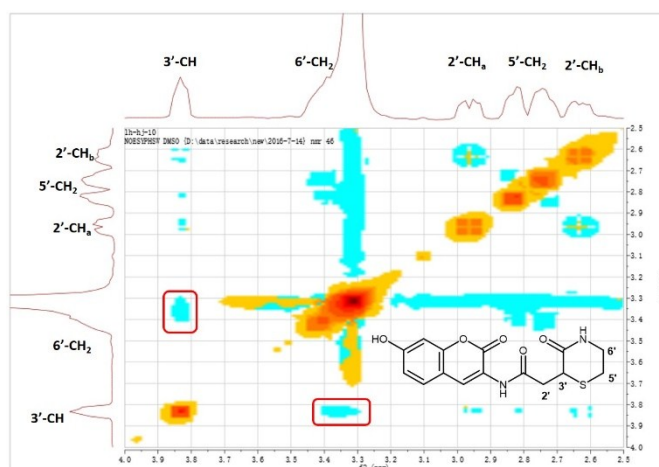

(2D-NOESY spectrum: the cross-peaks (labelled red) between the proton on the 3'-position and one of two-protons on the 6'-position supporting the formation of six-membered ring)<sup>7</sup>

Elemental Composition Report

Page 1

Single Mass Analysis

Tolerance = 50.0 PPM / DBE: min = -1.5, max = 100.0

Element prediction: Off

Number of isotope peaks used for i-FIT = 3

Monoisotopic Mass, Even Electron Ions

72 formula(e) evaluated with 1 results within limits (up to 1 closest results for each mass)

Elements Used:

C: 0-15 H: 0-33 N: 0-2 O: 0-5 Na: 0-1 S: 0-1

H-LI

ECUST institute of Fine Chem

16-Jul-2016

11:56:28

1: TOF MS ES+

9.88e+002

LH-THJ-10 41 (0.356) Cm (41:43)

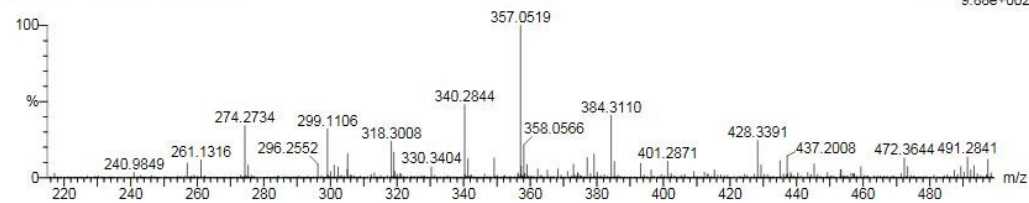

Minimum: -1.5  
Maximum: 100.0

| Mass     | Calc. Mass | mDa  | PPM  | DBE | i-FIT | i-FIT (Norm) | Formula            |
|----------|------------|------|------|-----|-------|--------------|--------------------|
| 357.0519 | 357.0521   | -0.2 | -0.6 | 9.5 | 141.2 | 0.0          | C15 H14 N2 O5 Na S |

Figure S17. <sup>1</sup>H NMR, <sup>13</sup>C NMR, 2D-COSY, 2D-NOESY, and HRMS of the compound 3a.

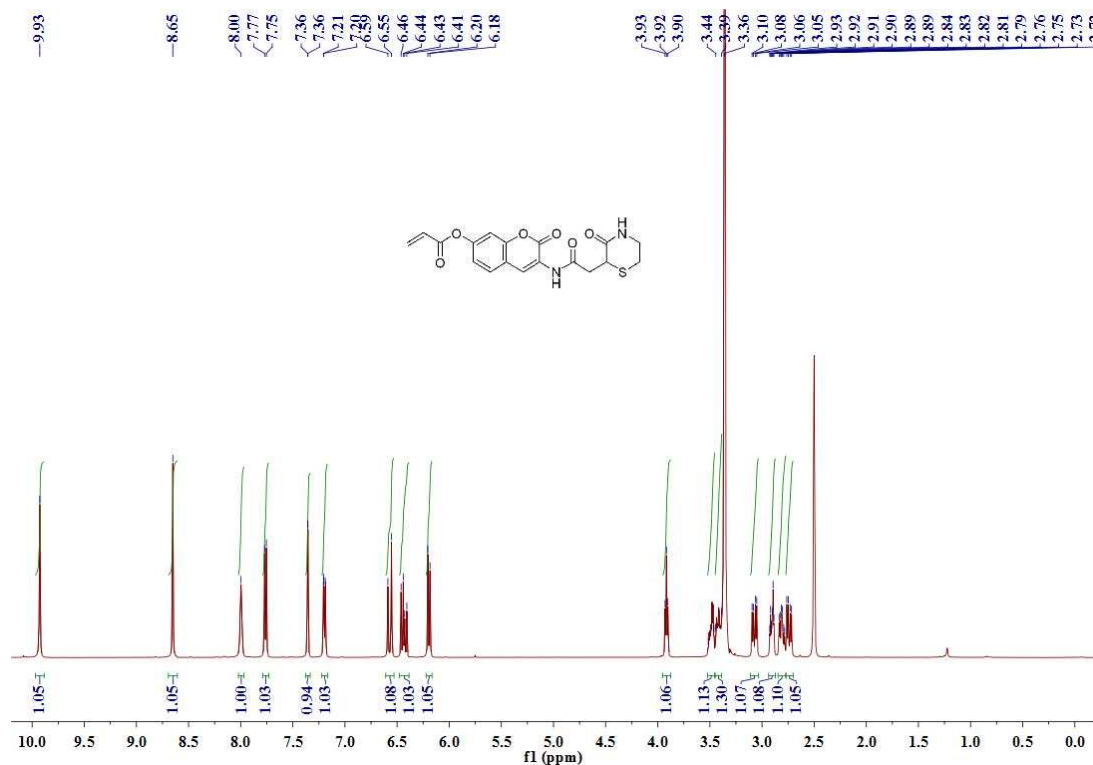

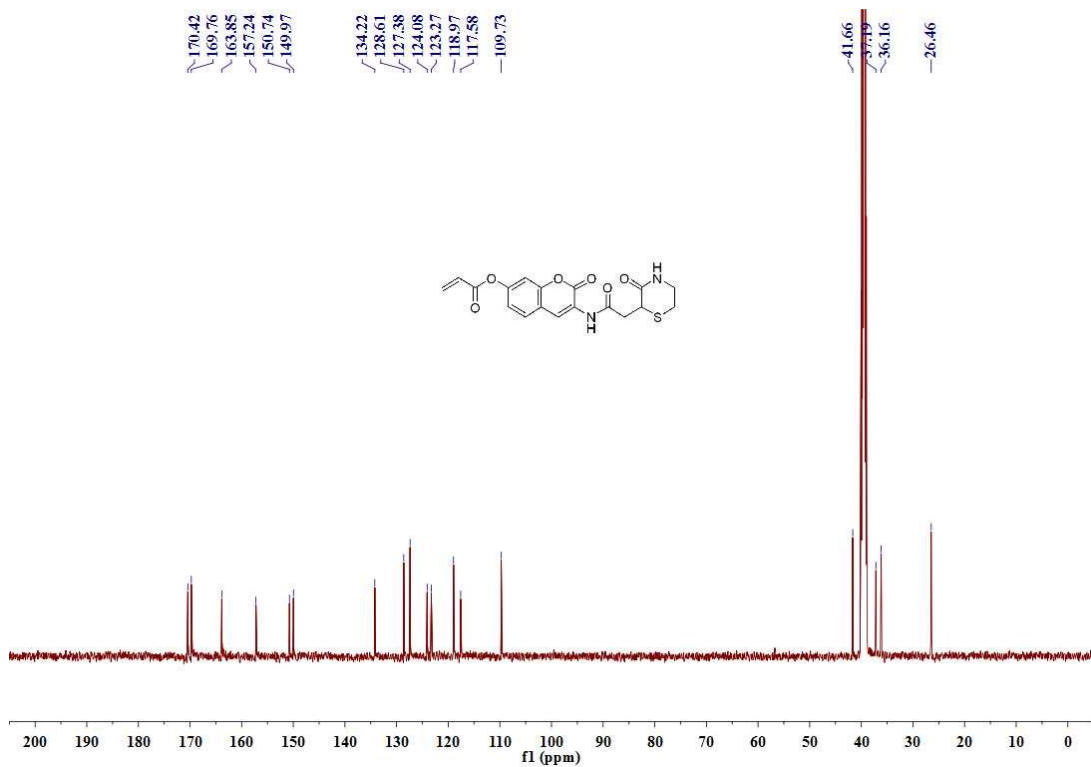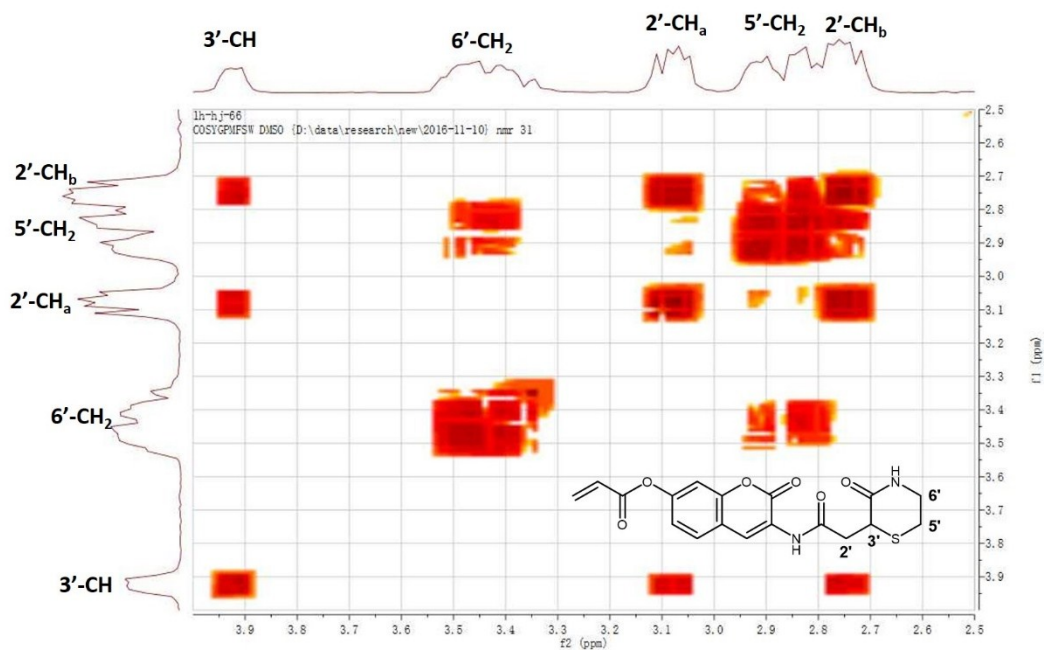



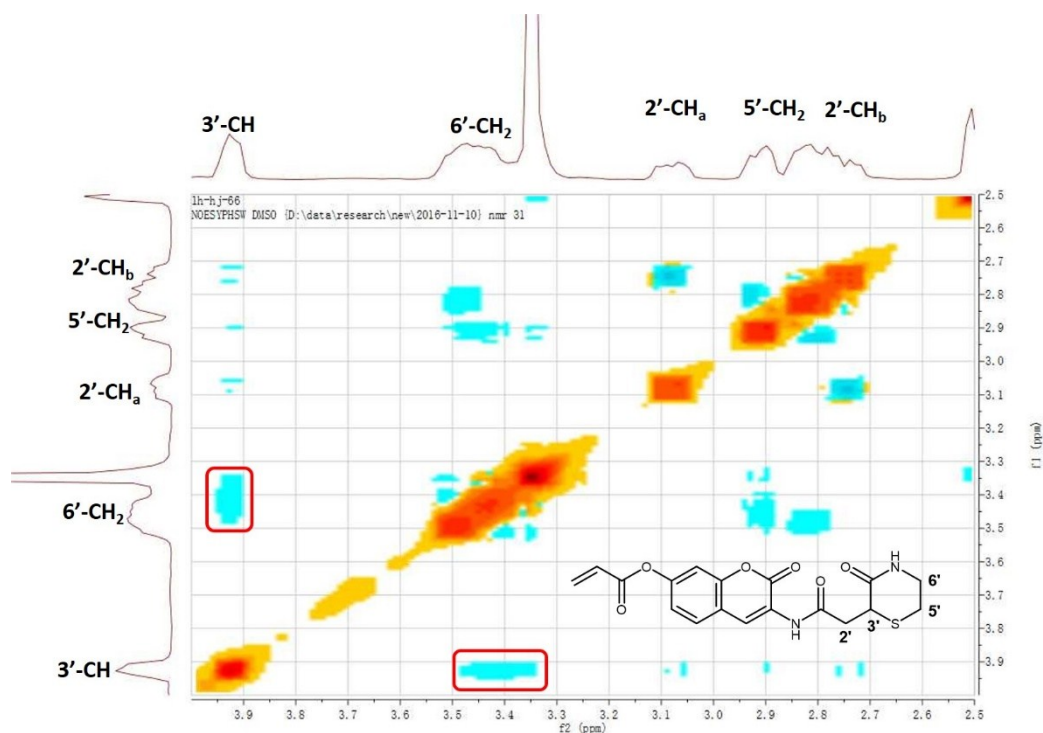

(2D-NOESY spectrum: the cross-peaks (labelled red) between the proton on the 3'-position and one of two-protons on the 6'-position supporting the formation of six-membered ring)<sup>7</sup>

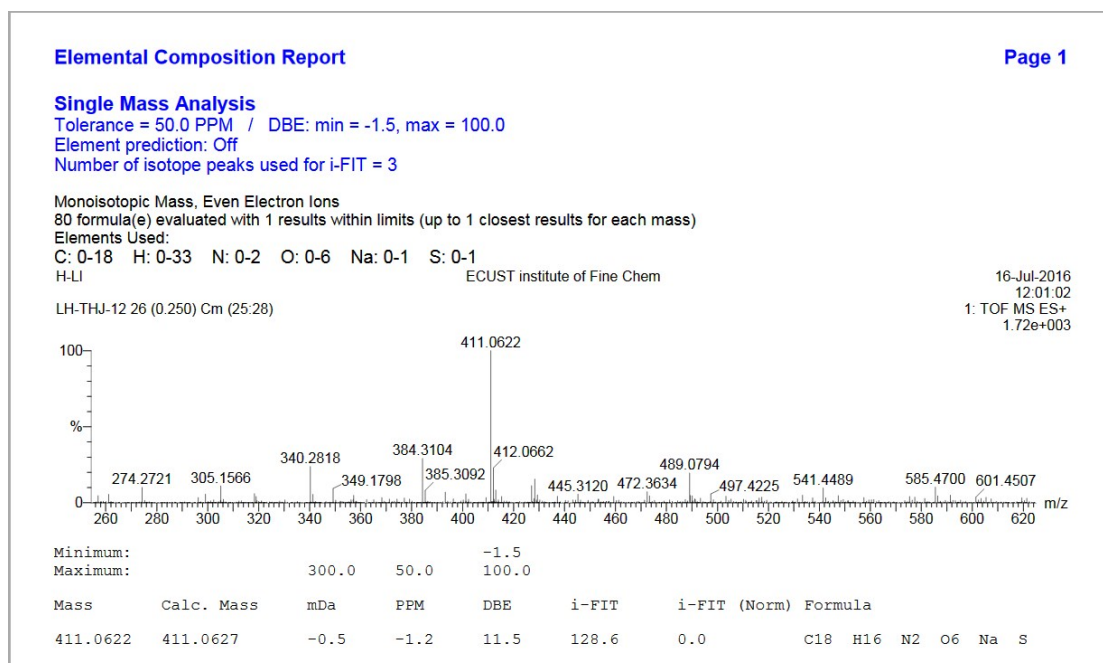

**Figure S18.** <sup>1</sup>H NMR, <sup>13</sup>C NMR, 2D-COSY, 2D-NOESY, and HRMS of **2a**.

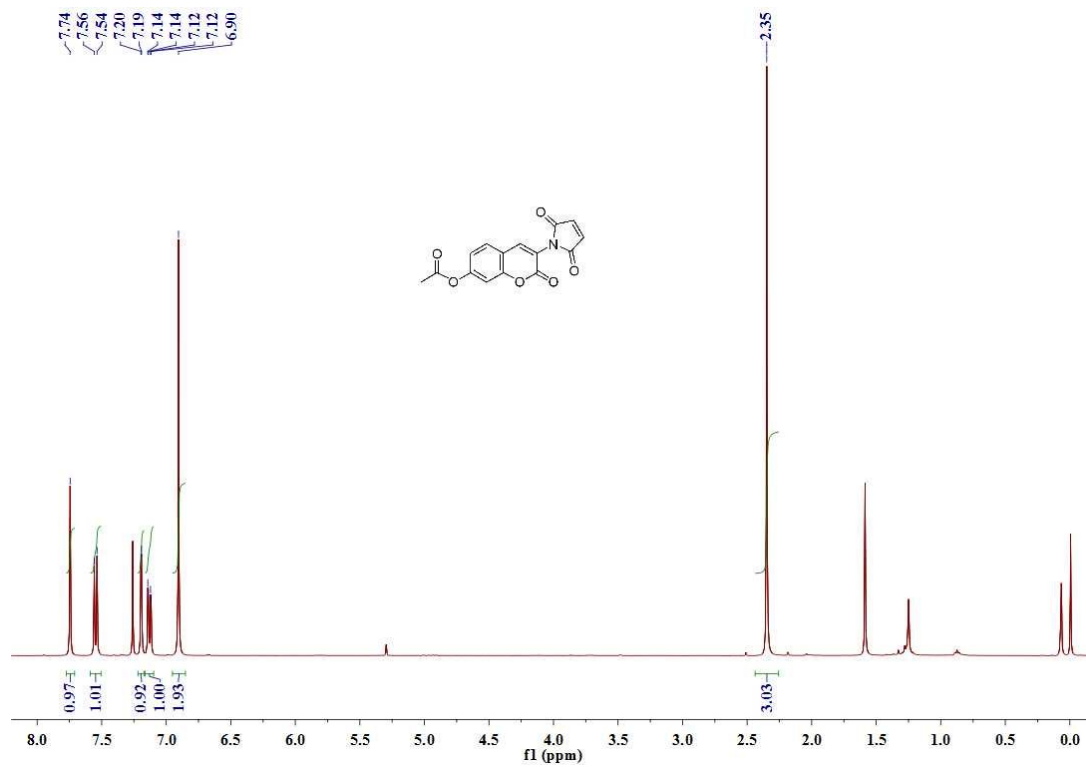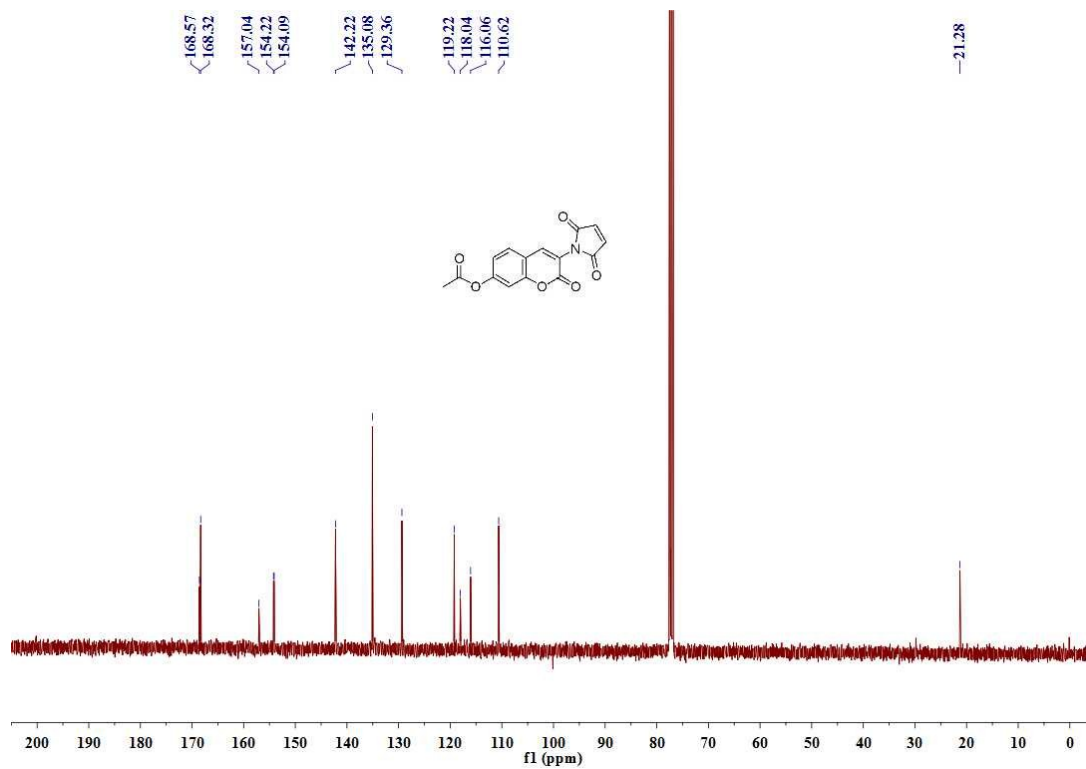

## Single Mass Analysis

Tolerance = 500.0 PPM / DBE: min = -1.5, max = 100.0

Element prediction: Off

Number of isotope peaks used for i-FIT = 3

Monoisotopic Mass, Even Electron Ions

32 formula(e) evaluated with 3 results within limits (up to 1 closest results for each mass)

Elements Used:

C: 0-15 H: 0-100 N: 0-1 O: 0-6 Na: 0-1

H-LI

ECUST institute of Fine Chem

04-Nov-2016

21:19:48

LH-HJ-33 4 (0.149) Cm (4:5)

1: TOF MS ES+  
1.65e+003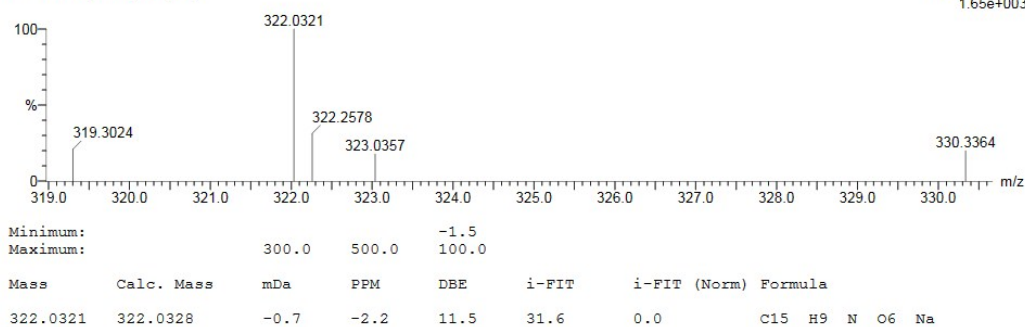Figure S19. <sup>1</sup>H NMR, <sup>13</sup>C NMR, and HRMS of the reference probe 6.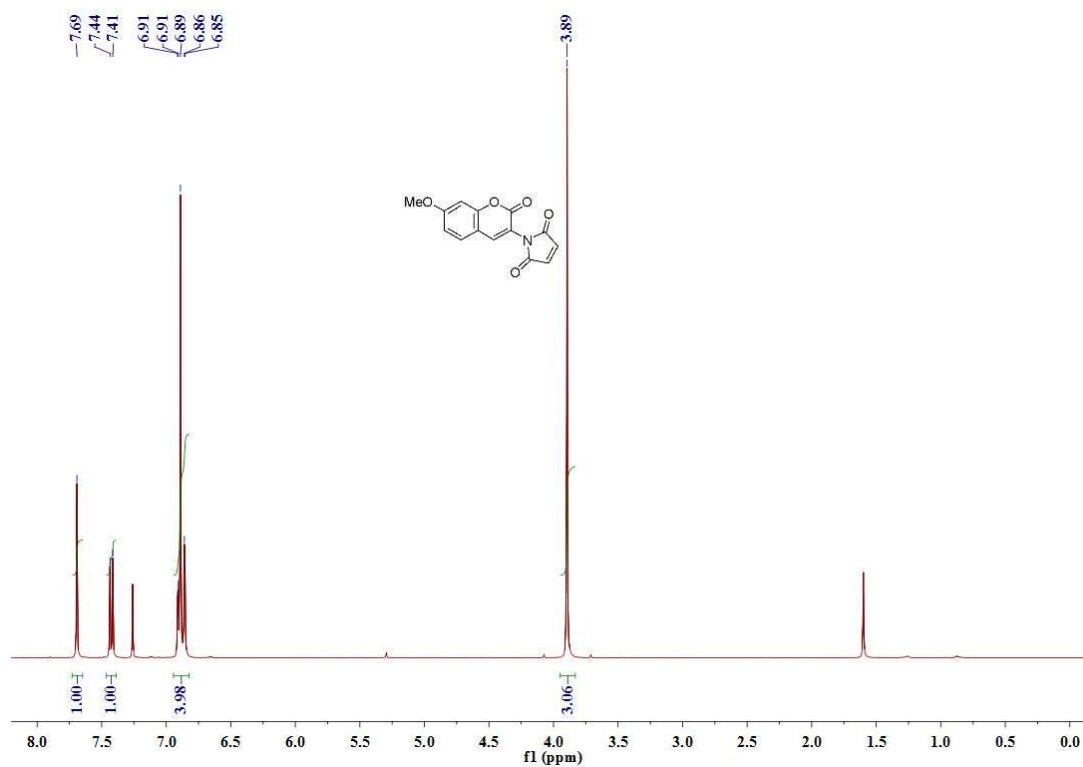

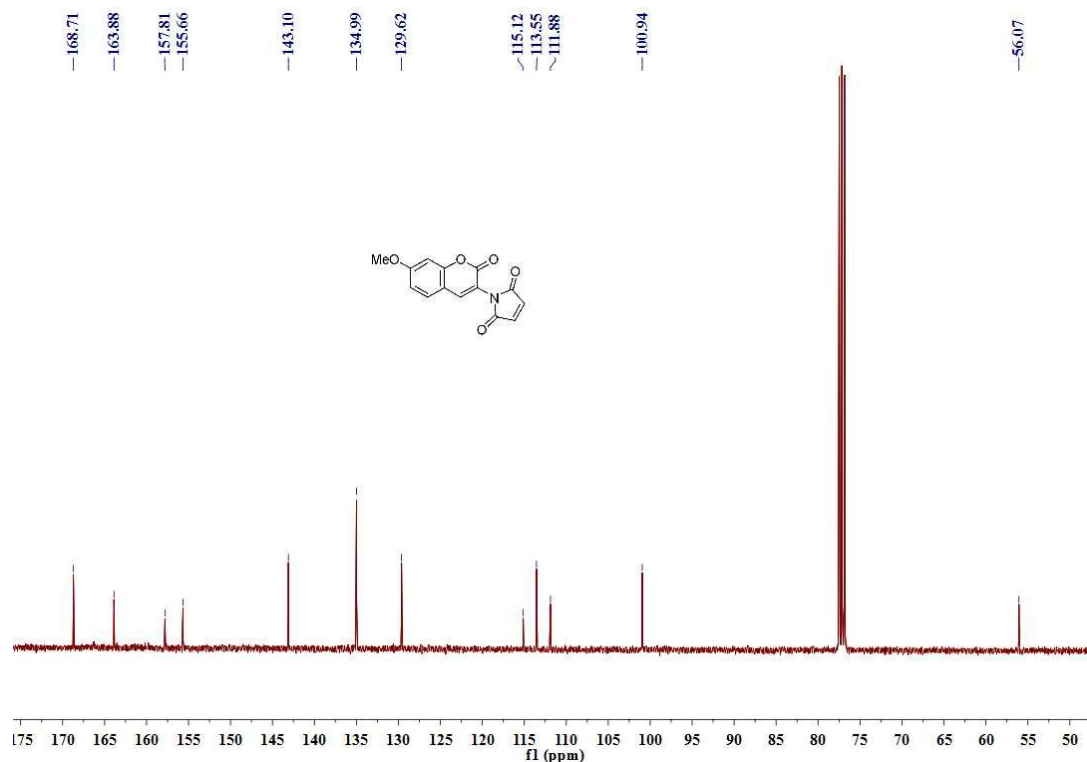

### Elemental Composition Report

Page 1

#### Multiple Mass Analysis: 2 mass(es) processed

Tolerance = 5.0 PPM / DBE: min = -5.0, max = 50.0

Element prediction: Off

Number of isotope peaks used for i-FIT = 3

Monoisotopic Mass, Even Electron Ions

4495 formula(e) evaluated with 4 results within limits (all results (up to 1000) for each mass)

Elements Used:

12C: 0-50 13C: 0-1 H: 0-50 N: 0-8 O: 0-10

HJ-64

XEVO-G2TOF#NotSet

16:10:43 01-Nov-2016

TOF MS ES+

6.83e+004

20160092 1068 (4.723) Cm (1068-(386:389+1776:1797))

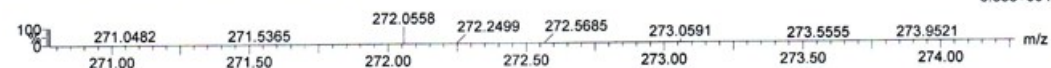

Minimum: 10.00  
Maximum: 100.00

| Mass     | RA     | Calc. Mass | mDa  | PPM  | DBE  | i-FIT | Norm  | Conf (%) | Formula            |
|----------|--------|------------|------|------|------|-------|-------|----------|--------------------|
| 272.0558 | 100.00 | 272.0559   | -0.1 | -0.4 | 10.5 | 97.0  | 0.497 | 60.85    | 12C14 H10 N O5     |
|          |        | 272.0560   | -0.2 | -0.7 | 2.5  | 97.5  | 0.938 | 39.15    | 12C4 13C H11 N4 O9 |
| 273.0591 | 14.64  | 273.0593   | -0.2 | -0.7 | 10.5 | 66.7  | 0.560 | 57.14    | 12C13 13C H10 N O5 |
|          |        | 273.0584   | 0.7  | 2.6  | 6.5  | 67.0  | 0.847 | 42.86    | 12C7 H9 N6 O6      |

Figure S20. <sup>1</sup>H NMR, <sup>13</sup>C NMR, and HRMS of the reference probe 7.

## References

1. L. Yi, H. Li, L. Sun, L. Liu, C. Zhang and Z. Xi, *Angew. Chem. Int. Ed.*, 2009, **48**, 4034-4037.
2. N. Gagey, M. Emond, P. Neveu, C. Benbrahim, B. Goetz, I. Aujard, J.-B. Baudin and L. Jullien, *Org. Lett.*, 2008, **10**, 2341-2344.
3. R. E. Benesch and R. Benesch, *J. Am. Chem. Soc.*, 1955, **77**, 5877-5881.
4. C. A. S. Regino and D. E. Richardson, *Inorg. Chim. Acta*, 2007, **360**, 3971-3977.
5. L. Cui, Y. Zhong, W. Zhu, Y. Xu and X. Qian, *Chem. Commun.*, 2010, **46**, 7121-7123.
6. A. H. Cory, T. C. Owen, J. A. Barltrop and J. G. Cory, *Cancer Commun.*, 1991, **3**, 207-212.
7. X. Li, Y. Zheng, H. Tong, R. Qian, L. Zhou, G. Liu, Y. Tang, H. Li, K. Lou and W. Wang, *Chem. Eur. J.*, 2016, **22**, 9247-9256.
